# 1 **Reconstruction of the cell entry pathway of an extinct virus**

2

3 Lindsey R. Robinson-McCarthy<sup>1,2</sup>, Kevin R. McCarthy<sup>3</sup>, Matthijs Raaben<sup>4</sup>, Silvia Piccinotti<sup>2#</sup>, Joppe  
4 Nieuwenhuis<sup>4</sup>, Sarah H. Stubbs<sup>2</sup>, Mark J.G. Bakkers<sup>2</sup>, and Sean P. J. Whelan<sup>1,2\*</sup>

5 <sup>1</sup>Program in Virology and <sup>2</sup>Department of Microbiology and Immunobiology, Harvard Medical  
6 School, Boston, Massachusetts, USA

7 <sup>3</sup>Laboratory of Molecular Medicine, Children's Hospital, Harvard Medical School, Boston,  
8 Massachusetts, USA

9 <sup>4</sup>Division of Biochemistry, Netherlands Cancer Institute, Amsterdam, The Netherlands

10 #Current address: Department of Stem Cell and Regenerative Biology, Harvard University,  
11 Cambridge, MA, USA

12

13 \*To whom correspondence should be addressed: [swhelan@hms.harvard.edu](mailto:swhelan@hms.harvard.edu) (SPJW)

14

15  
16  
17  
18  
19  
20  
21  
22  
23  
24  
25  
26  
27  
28  
29

## **Abstract**

Endogenous retroviruses (ERVs), remnants of ancient germline infections, comprise 8% of the human genome. The most recently integrated includes human ERV-K (HERV-K) where several envelope (*env*) sequences remain intact. Viral pseudotypes decorated with one of those Envs are infectious. Using a recombinant vesicular stomatitis virus encoding HERV-K Env as its sole attachment and fusion protein (VSV-HERVK) we conducted a genome-wide haploid genetic screen to interrogate the host requirements for infection. This screen identified 11 genes involved in heparan sulfate biosynthesis. Genetic inhibition or chemical removal of heparan sulfate and addition of excess soluble heparan sulfate inhibit infection. Direct binding of heparin to soluble HERVK Env and purified VSV-HERVK defines it as critical for viral attachment. Cell surface bound VSV-HERVK particles are triggered to infect on exposure to acidic-pH, whereas acid pH pretreatment of virions blocks infection. Testing of additional endogenous HERV-K *env* sequences reveals they bind heparin and mediate acid pH triggered fusion. This work reconstructs and defines key steps in the infectious entry pathway of an extinct virus.

30

### **Author Summary**

31           The genomes of all vertebrates are littered with the remains of once exogenous  
32 retroviruses. The properties of these ancient viruses that fostered germline colonization and  
33 their subsequent inheritance as genetic elements are largely unknown. The viral envelope  
34 protein (Env) dictates the cell entry pathway. Here we define host factors involved in the cell-  
35 entry of the youngest human ERV, HERV-K. Using a forward genetic screen, we identified  
36 heparan sulfate as a critical mediator of productive cell-entry. The abundance of this  
37 carbohydrate on almost all cells in the body suggests that HERV-K endogenization was a  
38 consequence of a broad tropism and not a specific targeting of germ cells. We demonstrate  
39 that multiple HERV-K Env protein encoded in the genome bind heparin. As HERV-K Envs are  
40 expressed in some transformed and virus-infected cells as well as during inflammation, it is  
41 tempting to speculate that this heparan sulfate binding property could be physiologically  
42 relevant during disease.

43

44

## Introduction

45           Endogenous retroviruses (ERVs) are remnants of ancient germline infections and  
46           comprise approximately 8% of the human genome [1]. The degraded nature of ERV sequences  
47           impedes investigation of the properties of the infectious progenitor viruses and the events that  
48           led to their endogenization. During evolution, ERV sequences accumulate mutations,  
49           consequently the most recently endogenized sequences are the most likely to reflect the  
50           properties of the progenitor virus from which they were derived. The most recent human  
51           endogenous retroviruses (HERVs) belong to the HERV-K (HML-2) group. Multiple  
52           endogenization events resulted in approximately 90 proviral copies and 1,000 solo long  
53           terminal repeats (LTRs) in the reference human genome [2]. The HERV-K (HML-2) group is  
54           approximately 30-35 million years old [3], with evidence of endogenization as recently as  
55           100,000-600,000 years ago [4, 5].

56           Many HERV-K sequences exist as largely intact proviral copies, some of which still  
57           encode single functional proteins [6]. While no single locus has been demonstrated to produce  
58           an infectious virus, many loci have retained the capacity to produce individual functional  
59           proteins. For example, at least one copy, termed HERV-K 108, has retained the capacity to  
60           produce an envelope (Env) that can mediate cellular attachment and entry [7]. Two replication-  
61           competent infectious clones, Phoenix [8] and HERV-K<sub>CON</sub> [9] have been reconstructed from  
62           consensus sequences comprising the most recently endogenized loci. The reconstructed viruses  
63           grow poorly which has hampered efforts to study the biology of their envelope proteins.

64           The processes that govern endogenization are poorly defined. The first virus-cell

65 contacts are mediated through viral glycoproteins, which can dictate species, tissue and cellular  
66 tropism. We have previously overcome some of the challenges imposed by viral titer by  
67 generating an infectious vesicular stomatitis virus (VSV) in which the glycoprotein was replaced  
68 by Phoenix Env (VSV-HERVK). Using this virus we determined that HERV-K Env imparts a broad  
69 species and tissue tropism [10] and demonstrate that productive infection of mammalian cells  
70 requires access to an acidified compartment that is accessed via a dynamin-dependent but  
71 clathrin-independent pathway [10]. We also found that proteolytic processing and acid pH are  
72 required for HERV-K Env to mediate membrane fusion. A broad species and cell-type tropism  
73 was also described for a modified variant of a different ancestral sequence [11]. The broad host  
74 range reported in those studies implies that host factors required for HERV-K entry are  
75 evolutionarily conserved and ubiquitously expressed.

76 To identify such host factors we performed a genome-wide haploid genetic screen by  
77 selecting cells resistant to VSV-HERVK infection. This approach has identified critical host  
78 factors required for the entry of several extant viruses, including Ebola, Lassa, Lujo, Andes virus,  
79 and Rift Valley fever virus [12-17]. We identify genes involved in heparan sulfate biosynthesis  
80 and demonstrate a specific interaction between this glycosaminoglycan and multiple HERV-K  
81 envelope proteins. We further show that acid pH is required to trigger membrane fusion by  
82 these Envs and is sufficient to mediate infection of cell surface virus and to inactivate unbound  
83 virions. Based on our findings we posit a model for the entry pathway of this extinct virus  
84 where heparan sulfate binding followed by subsequent endosomal uptake and acidification  
85 result in productive infection.

86

## Results

87 To identify host factors required for HERV-K Env mediated entry, we performed a  
88 haploid genetic screen [12] (Fig 1A-B). Briefly, HAP1 cells were mutagenized using a retroviral  
89 gene-trap vector to generate a population with inactivating mutations across the genome and  
90 infected with VSV-HERVK. Deep sequencing genomic DNA from cells that survived VSV-HERVK  
91 infection identified sites of integration of the gene-trap retrovirus (Fig 1C). Among the genes  
92 identified were 11 involved in the biosynthesis of heparan sulfate - a glycosaminoglycan (GAG)  
93 ubiquitously expressed on the cell surface. Six of those genes (*GPC3*, *EXT1*, *EXT2*, *EXTL3*,  
94 *HS2ST1*, and *NDST1*) are specific to heparan sulfate and heparin and not other GAGs (S1 Fig).  
95 For follow up, we selected *EXT1* which encodes an enzyme that catalyzes the addition of a  
96 glucaronic acid – N-aceetylglucosamine (GlcA-sGlcNAc) disaccharide onto the growing heparan  
97 sulfate chain and *SLC35B2* which encodes the Golgi-resident transporter of the universal sulfate  
98 donor 3'-phosphoadenosine-5'-phosphosulfate (PAPS) [18]. Three additional genes, myosin X  
99 (*MYO10*), sortilin (*SORT1*), and CREB binding protein (*CREBBP*) scored as significant and were  
100 also selected for further follow up.

101 We independently generated single-cell clones of HAP1 cells lacking each of those 5  
102 genes by gene editing and infected them with VSV or VSV-HERVK expressing eGFP as a marker  
103 of infection (Fig 1D). This eliminated *MYO10*, *SORT1* and *CREBBP* from further analysis in viral  
104 entry because the fraction of cells infected was only modestly changed (Fig 1D and S2 Fig). In  
105 *MYO10*<sup>KO</sup> cells we note however that the intensity of eGFP expression increased following  
106 infection with VSV but slightly decreased following infection with VSV-HERVK (S2 Fig). This

107 result indicates that elimination of myosin X differentially impacts the kinetics of productive  
108 infection perhaps reflective of the distinct uptake mechanisms of VSV compared to VSV-HERVK  
109 (S2 Fig). By contrast, VSV-HERVK infection of *EXT1*<sup>KO</sup> and *SLC35B2*<sup>KO</sup> cells was reduced 4-fold  
110 compared to VSV. VSV infection was unaffected in *EXT1*<sup>KO</sup> cells, but was diminished 3-fold in  
111 *SLC35B2*<sup>KO</sup> cells. Those results demonstrate that elimination of cell surface heparan sulfate  
112 reduces VSV-HERVK infection specifically and that suppression of sulfation also reduces VSV  
113 infection in a manner that appears independent of heparan sulfate (S2 Fig). Flow cytometry  
114 verified that cell surface expression of heparan sulfate was lost in both *EXT1*<sup>KO</sup> and *SLC35B2*<sup>KO</sup>  
115 cells and was restored following transduction with retroviruses expressing the corresponding  
116 gene (S3 Fig). Restoration of cell surface heparan sulfate corresponded with an increase in VSV-  
117 HERVK infection (Fig 2A). Loss of heparan sulfate did not completely block VSV-HERVK infection  
118 as evident from the small fraction of infected cells. That small fraction, however, exhibits a 2-3  
119 fold reduction in the intensity of eGFP, presumably reflecting a less efficient heparan sulfate  
120 independent mechanism of viral entry (Fig 2B and S4 Fig).

121 As a complementary approach to genetic inactivation of heparan sulfate biosynthesis,  
122 we employed a chemical approach. Sodium chlorate treatment of cells inhibits the synthesis of  
123 PAPS and correspondingly reduces cell surface sulfation. Cells cultured in the presence of 50  
124 mM sodium chlorate showed a 30-fold reduction in infectivity of VSV-HERVK compared to VSV  
125 (Fig 2C). The fraction of cells that were infected by VSV-HERVK again showed a reduction in the  
126 levels of eGFP expressed, following entry independent of heparan sulfate (Fig 2C and S4 Fig).  
127 These results confirm the findings obtained following genetic inactivation of heparan sulfate  
128 biosynthesis and support a role for heparan sulfate in HERV-K entry.

129 Heparan sulfate has been identified as a receptor for herpes simplex virus 1 (HSV1) [19]  
130 and eastern equine encephalitis virus (EEEV) [20]. If heparan sulfate serves as a key entry factor  
131 for HERV-K, VSV-HERVK infection should be sensitive to competition by excess soluble GAGs.  
132 Incubation of purified virus with soluble heparin - a highly sulfated analog of heparan sulfate -  
133 or with heparan sulfate, inhibits infection in a concentration dependent manner. The sulfated  
134 GAGs chondroitin or dermatan sulfate had no effect on VSV or VSV-HERVK infection further  
135 supporting a specific requirement for heparan sulfate in HERVK infection at the level of viral  
136 attachment (Fig 2D). Consistent with this interpretation, attachment of single VSV-HERVK  
137 particles to *SLC35B2*<sup>ko</sup> cells was reduced at least 2-fold compared to WT cells (Fig 2E-G) at both  
138 4°C and 37°C. By contrast VSV particle binding was similar between both cell types at both  
139 temperatures (Fig 2G).

140 Further evidence that heparan sulfate serves an entry factor was provided by the  
141 demonstration that VSV-HERVK particles specifically associate with heparin but not protein A  
142 beads (Fig 3A). This heparin bead binding was sensitive to inhibition by pre-incubation of virus  
143 with soluble heparin. VSV did not bind either heparin or protein A beads, underscoring that  
144 binding is dictated by the HERV-K glycoprotein. To test whether HERV-K Env directly interacts  
145 with heparin, we generated a soluble, monomeric HERV-K SU subunit, which by extrapolation  
146 from extant retroviruses would harbor the receptor-binding domain (Fig 3B, S5 Fig, and S6 Fig).  
147 Soluble HERV-K SU specifically bound to heparin but not protein A beads, and this binding was  
148 sensitive to pre-incubation of the protein with soluble heparin (Fig 3C). As expected a soluble  
149 receptor-binding domain from Influenza A hemagglutinin (HA), which binds a different  
150 carbohydrate receptor, sialic acid, failed to bind either the heparin or protein A beads, further



151 supporting the specificity of the HERVK-heparan sulfate interaction. Pre-incubation of HERV-K  
152 SU with soluble GAGs prior to mixing with heparin beads demonstrates that binding is inhibited  
153 by soluble heparin and heparan sulfate, but not chondroitin or dermatan sulfate (Fig 3D). These  
154 data correlate with the suppression of infectivity, and provide further evidence that heparan  
155 sulfate binding leads to productive infection by VSV-HERVK. We further found that HERV-K SU  
156 binding to heparin beads was unaffected by pre-incubation with 2-O-desulfated heparin,  
157 whereas 6-O-desulfated heparin showed partial inhibition of binding (Fig 3D). This result implies  
158 that 2-O sulfation and not 6-O sulfation is important for HERV-K binding. Consistent with this,  
159 our genetic screen identified the enzyme that catalyzes 2-O-sulfation (heparan sulfate 2-O-  
160 sulfotransferase 1 (HS2ST1)) but not the enzymes that catalyze 6-O-sulfation (HS6ST1,2,3).

161         Acidic pH – such as that encountered in endocytic compartments – serves as the trigger  
162 for conformational rearrangements in several viral envelope proteins necessary for membrane  
163 fusion. In class I fusion proteins, such as influenza HA, those rearrangements are irreversible,  
164 such that premature exposure to acidic pH inactivates the fusion machinery. Envelope proteins  
165 from every extant betaretrovirus that has been tested, including Jaagsiekte sheep retrovirus  
166 (JSRV), enzootic nasal tumor virus (ENTV), and mouse mammary tumor virus (MMTV), as well as  
167 the alpharetrovirus avian leukosis virus (ALV) are not inactivated on exposure to mildly acidic  
168 pH [21-24]. JSRV and ALV are only inactivated if first bound to their receptor, suggesting an  
169 essential two-step fusion mechanism of receptor binding followed by exposure to low pH [22,  
170 24]. To test whether exposure to acid pH inactivates HERVK Env, we exposed purified VSV-  
171 HERVK to increasingly acidic pH for 30 minutes, neutralized the pH and then measured the  
172 residual infectivity. Treatment of purified VSV-HERVK particles at pH <6.0 reduced infectivity

173 (Fig 4A). By contrast the infectivity of VSV was unaffected reflecting the reversibility of the  
174 conformational changes in VSV G when exposed to acid pH [25-27]. We next examined whether  
175 VSV-HERVK infection requires endocytosis beyond a need for acidic pH. For this purpose we  
176 bound virus to the cell surface and exposed cells to a brief pulse of acidic pH (Fig 4B). Infection  
177 was readily established demonstrating that endocytic uptake is not required and establishing a  
178 minimal requirement and a necessary order of virus attachment and acidic pH for HERV-K Env  
179 mediated entry

180 To determine whether heparin binding and acid pH triggered fusion are retained by  
181 distinct HERVK Env sequences we compared the Phoenix Env sequence with that of two distinct  
182 genomic copies, K108 and Xq21.33 [5, 28] (S7 Fig). All three Env sequences mediate acid pH  
183 dependent cell-cell fusion, although the relative fusogenicity of Xq21.33 is reduced (Fig 4D).  
184 Using lysates of cells overexpressing the individual envelope proteins we also demonstrate that  
185 the 3 HERV K Envs, but not VSV G, are specifically bound by heparin beads (Fig 4D). These  
186 results underscore that both heparin binding and acid pH triggered fusion are shared properties  
187 of multiple HERV-K envelope sequences present in the genome.

188

189

## Discussion

190           The major conclusion of this study is that heparan sulfate is a direct HERV-K Env  
191 attachment factor. Binding of HERVK Env to heparan sulfate is most sensitive to the loss of 2-O  
192 sulfation, implicating this modification in attachment. Combined with earlier work we posit the  
193 following model for the entry of the retrovirus HERV-K (Fig 5). Following binding to cell surface  
194 heparan sulfate, virus is taken up into cells in a dynamin-dependent, clathrin independent  
195 manner with subsequent acidification of the endosome leading to membrane fusion and  
196 productive infection. This model is reminiscent of the sialic-acid binding and acid pH  
197 requirement for productive influenza virus entry. We cannot, however, rule out the possibility  
198 that HERV-K entry may require additional host factors not identified through the haploid  
199 genetic screening approach – such as essential host genes, or those with redundant function.  
200 The low pH-mediated inactivation of VSV-HERVK, and lack of identification of endosomal  
201 factors other than acidic pH, raise the possibility that heparan sulfate may act directly as a  
202 receptor. Regardless of whether binding to heparan sulfate is sufficient to fulfill both  
203 attachment and receptor functions, this study defines heparan sulfate as an important host  
204 factor for HERV-K Env-mediated cell entry. The ability of HERVK Env to bind heparan sulfate  
205 underscores that such binding is an ancient property of viruses.

206           For many viruses, heparan sulfate binding reflects an adaptation to growth in cell  
207 culture. By contrast, heparan sulfate binding is an intrinsic property of the original HERV-K Env  
208 because the *env* sequences we used are not derived from viruses grown in cell culture, and  
209 such binding is apparent for multiple HERV-K Envs as they exist in the genome and at least one

210 putative ancestral sequence. Several extant retroviruses including the prototype foamy virus  
211 (PFV), MMTV, and human T-lymphotropic virus 1 (HTLV-1) bind heparan sulfate [29-31]. MMTV  
212 requires engagement of transferrin receptor [32] and HTLV-1 requires neuropilin 1 and glucose  
213 transporter 1 [33, 34] for entry. Proteinaceous receptors for PFV have not been identified, and  
214 like HERV-K it has proved difficult to identify cell types that are refractory to entry. Although we  
215 cannot rule out the presence of an additional unidentified host factor for HERVK entry, the  
216 demonstration that acid pH alone can trigger HERVK Env suggests that engagement of such a  
217 second molecule may not be essential for infection. We do, however, observe some infectivity  
218 in cells lacking heparan sulfate by its genetic or chemical inhibition demonstrating that  
219 molecules other than heparan sulfate facilitate cell entry.

220 Our conclusions are based on the results from a genetic screen performed using VSV-  
221 HERVK, combined with genetic, biochemical and cell biological follow up experiments to  
222 validate the importance of heparan sulfate. In our prior work with VSV recombinants containing  
223 heterologous envelope proteins we have always validated our findings using the respective wild  
224 type virus. For HERV-K such validation experiments were not possible because the  
225 reconstructed viruses replicate poorly. Lentiviral particles pseudotyped with HERV-K Env have  
226 been described but they also produce low viral titers, ranging from approximately 60-1000  
227 infectious units ml<sup>-1</sup> as determined using a spinoculation based infectivity assay [7-9]. We  
228 obtain similar titers of pseudotyped lentiviruses without such spinoculation - 179-517 infectious  
229 units ml<sup>-1</sup>. Those titers are substantially below the 3x10<sup>7</sup> infectious units ml<sup>-1</sup> of VSV-HERVK  
230 [10], limiting the utility of the lentiviral pseudotypes in such validation experiments.  
231 Nevertheless, we carried out experiments using such lentiviral pseudotypes using Env null

232 “bald” particles as a stringent background infectivity control. Using such lentiviral pseudotypes  
233 we observe trends similar to those with VSV-HERVK when heparan sulfate biosynthesis  
234 pathways are manipulated (S8 Fig). We therefore cannot rule out the possibility that  
235 contributions of particle geometry and glycoprotein density might influence the entry of VSV-  
236 HERVK into cells in a manner that does not fully recapitulate that of wild type HERV-K virus. We  
237 cannot know the glycoprotein density on HERV-K – it may range from the low levels observed  
238 for HIV to the high levels on MMTV [35]. Such considerations do not, however, affect the major  
239 conclusions of this study as evidenced by the fact that biochemically pure wild type HERV-K Env  
240 binds heparin, and heparin binding and acid pH triggered fusion are properties of three distinct  
241 HERV-K Env sequences.

242         HERV-K(HML-2) proviruses are present in all humans and HERV-K Env is expressed  
243 during a number of diseases, including viral infection, cancer, and autoimmune diseases [6, 36].  
244 While these Envs are unlikely to be fusogenic at normal extracellular pH, they will likely act as  
245 heparan sulfate binding proteins on the cell surface and would, in principle foster contacts with  
246 the extra cellular matrix through heparan sulfate engagement. Heparan sulfate is involved in a  
247 multitude of physiological functions, from cell adhesion and migration to cell signaling [37-40].  
248 Heparan sulfate proteoglycans have been implicated in cancer invasion and metastasis, often  
249 through dysregulation of cell signaling pathways [37]. Heparan sulfate binding by HERV-K Env  
250 could thus play a role in these processes. Overexpression of HERV-K Env on cancer cells could  
251 facilitate invasion and metastasis through binding heparan sulfate on the surface of neighboring  
252 cells or the extracellular matrix. HERV-K Env binding heparan sulfate proteoglycans may also  
253 disrupt normal signaling cascades in which these proteoglycans are involved.

254           As HERV-K is a relatively young group of ERVs, the ultimate fate of HERV-K Env is not yet  
255 fixed. Several HERV envelopes have been coopted throughout evolution to perform important  
256 functions for the host. These include the syncytins, which are essential for placentation [41],  
257 HERV-T Env, which has antiviral properties and may have contributed to its own extinction [42],  
258 and HEMO, a recently identified Env product that is shed in the blood of pregnant women [43].  
259 HERV-K Env is known to be expressed in healthy tissues as well, including stem cells and during  
260 early stages of embryogenesis [36, 44]. It remains to be determined whether there is any  
261 physiological consequence of heparan sulfate binding by HERV-K Env in instances when it is  
262 actively expressed.

263           The conservation of heparan sulfate throughout metazoans and its ubiquitous  
264 expression presents no barrier for this ERV to enter into germ cells – a step essential for its  
265 endogenization – and implies that other steps of the HERV-K replication cycle result in the  
266 observed species tropism. The broad distribution of heparan sulfate is consistent with findings  
267 for other endogenous retroviruses. These include murine leukemia virus and MMTV, which  
268 utilize receptors that are broadly expressed in their respective host, and which exist as both  
269 endogenous and exogenous viruses [45-51]. This also holds true for other extinct primate  
270 endogenous retroviruses, chimp endogenous retrovirus 2 (CERV2) and human endogenous  
271 retrovirus T (HERV-T) [42, 52]. Perhaps the great majority of endogenous retroviruses were  
272 able to colonize the germline because their broad tropism allowed access to germ cells.  
273 Germline integration and endogenization would become chance events by such “promiscuous”  
274 viruses, rather than viruses that specifically target germ cells.

275

## **Materials and Methods**

### **276 Cell lines, viruses, and plasmids.**

277           BSRT7 cells (a kind gift from U.J. Buchholz[53]) and 293T cells (ATCC CRL-3216; American  
278 Type Culture Collection, Manassas, VA) were grown in Dulbecco's modified Eagle's medium  
279 (DMEM) supplemented with 10% fetal bovine serum (FBS) and maintained at 37°C and 5% CO<sub>2</sub>.  
280 HAP1 cells (a kind gift from Thijn Brummelkamp [12]) were grown in Iscove's modified  
281 Dulbecco's medium (IMDM) supplemented with 10% FBS and maintained at 37°C and 5% CO<sub>2</sub>.  
282 All cell lines were tested to be free of mycoplasma. VSV-HERVK<sup>+</sup>, referred to throughout this  
283 manuscript as VSV-HERVK, and VSV-eGFP were generated as previously described [10, 54]. VSV-  
284 HERVK encodes the env from the Phoenix consensus sequence[8], where the cytoplasmic tail  
285 has been replaced with that of VSV G. Both viruses express eGFP from the first position in the  
286 genome. Viruses were grown on BSRT7 cells. Viruses were tittered by plaque assay on BSRT7  
287 cells and flow cytometry on HAP1 cells.

288           pCAGGS-PhoenixEnv and pGEM-PhoenixEnv were previously generated [10]. We  
289 synthesized codon-optimized versions of HERV-K 108 *env* and Xq21.33 *env* (Genscript,  
290 Piscataway, NJ) and subsequently cloned them into pCAGGS and pGEM to generate pCAGGS-  
291 HERVK108Env, pCAGGS-Xq21.33Env, pGEM-HERVK108Env, and pGEM-Xq21.33Env,  
292 respectively. Plasmids containing the cDNA for *EXT1* and *SLC35B2* were obtained from the  
293 Dana-Farber plasmID repository (Dana-Farber/Harvard Cancer Center DNA Resource Core,  
294 Boston, MA). These cDNAs were amplified with primers to add a C-terminal HA tag and were  
295 cloned into pQCXIN (Clontech, Mountain View, CA). lentiCas9-Blast [55] (Addgene plasmid

296 #52962), lentiGuide-Puro [55] (Addgene plasmid #52963), lentiCRISPRv2 [55] (Addgene plasmid  
297 #52961) and pX330 [56] (Addgene plasmid #42230) were a gift from Feng Zhang.

### 298 **Haploid genetic screen with VSV-HERVK.**

299 HAP1 cells were mutagenized with a genetrapp retrovirus as described [13].  
300 Approximately  $10^8$  cells were infected with VSV-HERVK at a multiplicity of infection (MOI) of 3  
301 infectious units (IU) per cell. Infection was allowed to proceed for several days, after which a  
302 second round of infection was performed to kill remaining susceptible cells. Genomic DNA was  
303 isolated from surviving cells and used to prepare a library for Illumina deep sequencing and  
304 reads analyzed as described [13]. Inactivating insertion sites (mapping to exons or in sense  
305 orientations in introns) in the VSV-HERVK selected cells (180,655 unique insertions) were  
306 compared to that of a control data set from unselected cells (2,161,301 unique insertions). *P*  
307 values for enrichment in the selected set versus control set were calculated using a Fisher's  
308 exact test. Significance scores are reported as the inverse log of the *p* value. Genes with  
309 insertions were also analyzed to identify bias in the direction of insertion of the genetrapp  
310 sequence within introns. Insertions in the forward direction are inactivating.

### 311 **Generation of knockout cells.**

312 To generate *CREBBP*<sup>KO</sup> cells, a guide RNA targeting the Histone Acetyl Transferase  
313 domain of CREBBP (5'-GGAGGTTTTTGTCCGAGTGG-3') was cloned into pX330 creating pX330-  
314 *CREBBP*. HAP1 cells were co-transfected with pX330-*CREBBP* and a plasmid containing an  
315 expression cassette for a guide RNA targeting the zebrafish *TIA* gene (5'-  
316 GGTATGTCGGGAACCTCTCC-3') followed by a CMV promoter sequence driving expression of a



317 blasticidin resistance gene flanked by two *TIA* target sites [57]. Co-transfection of these  
318 plasmids resulted in the incorporation of the blasticidin resistance cassette at the site of the  
319 targeted *CREBBP* locus. Four days after DNA transfection, the culture medium was  
320 supplemented with blasticidin (30 µg/mL). A single cell, blasticidin-resistant clone (C4C2) was  
321 expanded and disruption of *CREBBP* was verified by Sanger sequencing and Western blot for  
322 protein expression (using anti-CREBBP; clone C-20, Santa Cruz Biotechnology, Santa Cruz, CA).

323         To generate *MYO10*<sup>KO</sup> and *SORT1*<sup>KO</sup> cells, we first generated HAP1 cells stably expressing  
324 *Streptococcus pyogenes* Cas9 (HAP1-Cas9). Lentivirus was generated by transfecting 293T cells  
325 with lentiCas9-Blast, pCD/NL-BH\*DDD [58] and pCAGGS-VSVG. HAP1 cells were transduced  
326 with the lentivirus and selected with 5µg/ml blasticidin. Guide RNAs targeting exon 20 of  
327 *MYO10* (5'-CGCCTGGTCAAACCTGGTC-3') and exon 3 of *SORT1* (5'-CAGTCCAAGCTATATCGA-3')  
328 were individually cloned into lentiGuide-Puro. Lentivirus was generated by transfecting 293T  
329 cells with lentiGuide-MYO10sgRNA or lentiGuide-SORT1sgRNA, pCD/NL-BH\*DDD and pCAGGS-  
330 VSVG. HAP1 cells were transduced with the lentivirus and selected with 2 µg/ml puromycin.  
331 Single cell clones were screened by Western blot for expression of myosin-X and sortilin using  
332 anti-MYO10 (HPA024223; Sigma-Aldrich, St. Louis, MO) and anti-sortilin (ab16640; Abcam,  
333 Cambridge, MA) antibodies. To generate *EXT1*<sup>KO</sup> cells, guide RNAs targeting two sequences in  
334 exon 1 of *EXT1* (5'-GGCCAGAAATGATCCGGACT-3' and 5'-GCACAACGTCCTCCCCGTTA-3') were  
335 individually cloned into pX330. The plasmids were cotransfected along with pLPCX-Puro  
336 (Clontech) into HAP1 cells using lipofectamine 3000 transfection reagent (Life Technologies,  
337 Grand Island, NY). Cells were selected with 2 µg/ml puromycin. Genomic DNA from single cell  
338 clones was isolated using DirectPCR lysis reagent (Viagen Biotech, Los Angeles, CA) and

339 screened by PCR for an approximately 700 base pair deletion using the following primers: 5'-  
340 GAGTTGAAGTTGCCTTCCCG-3' and 5'-AGGCTTTTCAGTTTGCCCGA-3'. To generate *SLC35B2*<sup>KO</sup>  
341 cells, a guide RNA sequence targeting exon 4 of *SLC35B2* (5'-GCTTTCCCATCAGCATGACA-3') was  
342 cloned into the lentiCRISPRv2 plasmid [55]. Lentivirus was generated by transfecting 293T cells  
343 with lentiCRISPRv2-*SLC35B2*sgRNA, pCD/NL-BH\*DDD and pCAGGS-VSVG. HAP1 cells were  
344 transduced with the lentivirus and selected with 2 µg/ml puromycin. Single cell clones were  
345 screened by flow cytometry for reactivity with 10E4 (370255-1, AMS biotechnology, Cambridge,  
346 MA), an antibody specific for sulfated heparan sulfate. After selection and single cell cloning, all  
347 cells were maintained in IMDM+10% FBS without puromycin.

348 *B4GALT7*<sup>KO</sup> HEK293T cells were generated by CRISPR/Cas9-mediated genome  
349 editing essentially as described by Langereis *et al* [59] with two guide RNAs targeting  
350 *B4GALT7*'s active site encoded in exon 5 (gRNA 1: 5'-ATGGGATGTCCAACCGCTTC-3' and 5'-  
351 GAGTTCTACCGGCGCATTAA-3'). Single cell clones were isolated by fluorescence activated  
352 cell sorting (FACS) and genotyped by PCR and DNA sequencing. Loss of heparan sulfate  
353 expression was confirmed by flow cytometry with antibody 10E4.

354  
355

### 356 **Reconstitution of knockout cells with EXT1 or SLC35B2.**

357 Murine leukemia virus (MLV) carrying either EXT1-HA or SLC35B2-HA was generated by  
358 transfecting 293T cells with pCS2-MGP (Moloney MLV gag/pol expression vector [60]), pCAGGS-  
359 VSVG, and either pQCXIN-EXT1HA, pQCXIN-SLC35B2HA or pQCXIN empty vector. *EXT1*<sup>KO</sup> cells  
360 were transduced with MLV-EXT1HA or MLV-empty vector to generate *EXT1*<sup>KO</sup>+EXT1-HA or

361 *EXT1*<sup>KO</sup> Neo<sup>r</sup> control, respectively. *SLC35B2*<sup>KO</sup> cells were transduced with MLV-SLC35B2HA or  
362 MLV-Empty vector to generate *SLC35B2*<sup>KO</sup>+SLC35B2-HA or *SLC35B2*<sup>KO</sup> Neo<sup>r</sup> control, respectively.  
363 Cells were selected with 1.5 mg/ml G418. *SLC35B2*<sup>KO</sup>+SLC35B2-HA cells were further subcloned  
364 and single cell clones were screened for heparan sulfate expression using the 10E4 antibody. All  
365 reconstituted cells were maintained in IMDM with 10% FBS and 1.5 mg/ml G418.

### 366 **Heparan sulfate staining.**

367 Cells were collected with 10mM EDTA in PBS and subsequently resuspended in PBS with  
368 1% BSA and BD human Fc block (1:25 dilution; 564220, BD Biosciences, San Jose, CA). Cells were  
369 incubated with either the 10E4 monoclonal antibody to heparan sulfate (1:400), or mouse IgM  
370 (1:200; ab18401, Abcam, Cambridge, MA) for 1 hour (h) on ice. Cells were washed twice with  
371 PBS+1%BSA and incubated with goat anti-mouse IgG/IgM alexafluor 488 (1:500; A10680,  
372 Molecular Probes, Eugene, OR) for 1h on ice. Cells were washed twice and fixed in 2%  
373 paraformaldehyde (PFA). Fluorescence was measured using a FACSCalibur instrument (Cytex  
374 Development, Fremont, CA) and analyzed using FlowJo software (FlowJo Inc, Ashland, OR).

### 375 **Infectivity experiments.**

376 WT HAP1, *MYO10*<sup>KO</sup>, *CREBBP*<sup>KO</sup>, *SORT1*<sup>KO</sup>, *EXT1*<sup>KO</sup>, *EXT1*<sup>KO</sup> Neo<sup>r</sup> control, *EXT1*<sup>KO</sup>+EXT1-HA,  
377 *SLC35B2*<sup>KO</sup>, *SLC35B2*<sup>KO</sup> Neo<sup>r</sup> control, or *SLC35B2*<sup>KO</sup>+SLC35B2-HA cells were infected with VSV-  
378 HERVK or VSV-eGFP at an MOI of 1 IU/cell. Cells were collected 5h post-infection (pi) and fixed  
379 in 2% PFA. eGFP fluorescence was measured using a FACSCalibur instrument and the  
380 percentage of eGFP-positive cells, as well as mean fluorescence intensity was quantified using  
381 FlowJo software. The number of individual clones tested for each cell line are as follows:

382 *MYO10*<sup>KO</sup> (n=2), *CREBBP*<sup>KO</sup> (n=1), *SORT1*<sup>KO</sup> (n=3), *EXT1*<sup>KO</sup> (n=3), *SLC35B2*<sup>KO</sup> (n=1). Data are shown  
383 from multiple independent replicates in a single clonal cell line for each gene. Data are  
384 represented as fold difference in percent eGFP-positive cells or MFI compared to WT cells and  
385 normalized to VSV infectivity in each cell type. Error bars represent standard error of the mean  
386 from at least three independent biological replicates.

### 387 **Sodium chlorate treatment and infectivity.**

388 BSRT7 cells were passaged in sulfate-free Joklik modified minimal essential medium  
389 (M8028, Sigma-Aldrich, St. Louis, MO) with 10% FBS with or without 50mM sodium chlorate for  
390 at least two passages prior to seeding for infection. Cells were infected with either VSV-HERVK  
391 or VSV at an MOI of 1 particle forming unit (PFU)/cell. Cells were collected 5hpi and fixed in 2%  
392 PFA and fluorescence measured using a FACSCalibur instrument. The % eGFP-positive cells and  
393 MFI were quantified using FlowJo software. Data are represented as fold difference in % eGFP-  
394 positive cells or MFI normalized to VSV infected cells. Error bars represent standard error of the  
395 mean from three independent biological replicates.

### 396 **Inhibition of infection by soluble glycosaminoglycans.**

397 Heparin (H3393, Sigma-Aldrich), heparan sulfate (AMS GAGHS01, AMS bioscience),  
398 chondroitin sulfate A (C9819, Sigma-Aldrich) and dermatan sulfate (C3788, Sigma-Aldrich) were  
399 reconstituted in PBS. 1 µg of purified VSV-HERVK or VSV was incubated with the compounds at  
400 the indicated concentration in PBS for 1h at 37°C and then added to BSRT7 cells. Cells were  
401 incubated with virus and compound for 1h at 37°C, washed with DMEM and incubated for 4h at  
402 37°C. Cells were collected, fixed with 2% PFA and fluorescence measured using a FACSCalibur

403 instrument. The % eGFP-positive cells were quantified using FlowJo software and normalized to  
404 infectivity with no compound. Error bars represent standard error of the mean from three  
405 independent biological replicates.

#### 406 **Imaging of HERV-K attachment to cells.**

407 Gradient purified VSV-HERVK particles were labeled with AlexaFluor 647 and VSV particles  
408 were labeled with AlexaFluor 594, as described [61]. WT HAP1 or *SLC35B2*<sup>KO</sup> cells were pre-  
409 stained with calcein (diluted 1:1000; C3099, Molecular Probes, Eugene, OR) and NucBlue live  
410 cell stain (1:50, C34552, Molecular Probes) in IMDM for 30 minutes (min) at 37°C, followed by  
411 blocking in 1% BSA in IMDM for 30 min at 37°C. Labeled VSV-HERVK and VSV were added  
412 together to the cells. Cells were incubated with virus at either 37°C for 15 min or at 4°C for 1 h.  
413 Samples were fixed in 2% PFA and mounted with ProLong Gold (P10144, Molecular Probes).  
414 Samples were imaged using a Marianas system (Intelligent Imaging Innovations, Denver, CO)  
415 based on a Zeiss observer microscope (Carl Zeiss Microimaging, Thornwood, NY) outfitted with  
416 a 64 CSU-22 spinning-disk confocal unit (Yokogawa Electric Corporation, Musashino, Tokyo,  
417 Japan) and a 63x (Plan-Apochromat, NA 1.4; Carl Zeiss Microimaging) objective lens. Excitation  
418 wavelengths were 561 nm for AF594 and 660 nm for AF647. SlideBook 6.0 (Intelligent Imaging  
419 Innovations) was used to command the hardware devices and visualize and export the acquired  
420 data. Subsequent image analysis was conducted using ImageJ (National Institutes of Health).  
421 Briefly, cellular cytoplasmic areas were approximated by manually tracing the 2D cellular  
422 outline based on the calcein staining and determining its area. To simplify visualization, calcein  
423 aggregates were eliminated using the Remove Outliers tool in ImageJ. Bound VSV and VSV-

424 HERVK particles were counted for each cell, excluding large aggregates. Particle binding per  
425 area unit was calculated by dividing particle counts by the calculated areas. Data are  
426 represented as box plots indicating the median values, first and third quartiles, minima and  
427 maxima. Outliers were defined as those points 1.5 times the interquartile range, and severe  
428 outliers as those 3 times the interquartile range. Data are from multiple images from a single  
429 experiment. N values are as follows: for the 37°C experiment, 29 WT cells were counted, with  
430 189 VSV particles and 492 VSV-HERVK particles; 62 *SLC35B2*<sup>KO</sup> cells were counted with 252 VSV  
431 particles and 220 VSV-HERVK particles. For the 4°C experiment, 43 WT cells were counted, with  
432 629 VSV particles and 793 VSV-HERVK particles; 72 *SLC35B2*<sup>KO</sup> cells were counted with 790 VSV  
433 particles and 377 VSV-HERVK particles.

#### 434 **Virus and cell lysate heparin pull-downs.**

435 For all pull-downs, heparin beads (H6508, Sigma-Aldrich) and protein A beads (P2545,  
436 Sigma-Aldrich) were washed 3 times in the corresponding buffer and blocked for 1 h in PBS with  
437 1% BSA. BSRT7 cells were transfected with pCAGGS-PhoenixEnv, pCAGGS-HERVK108Env, or  
438 pCAGGS-Xq21.33Env. At 24h post-transfection, cells were lysed in TNE buffer (50mM Tris, 2mM  
439 EDTA, 150mM NaCl,) supplemented with 1% tritonX-100 and 200 µl lysate was incubated with  
440 50 µl of either heparin or control protein A beads at 4°C for 2 h. Beads were washed 5 times in  
441 TNE+1% tritonX-100 and bound proteins eluted by boiling in 2X SDS loading buffer for 5 min.  
442 Samples were loaded on a 10% (wt/vol) polyacrylamide gel and transferred to nitrocellulose  
443 membrane which were blocked with 5% milk in PBS+0.1% Tween-20 and subsequently blotted  
444 with anti-HERV-K Env antibody (1:2000; HERM-1811-5, Austral biological, San Ramon, CA)

445 followed by goat anti-mouse horseradish peroxidase (HRP) antibody (1:5000; Sigma-Aldrich).  
446 Membranes were incubated with ECL reagent (Thermo-Fisher Scientific, Waltham, MA) and  
447 signal was detected by film (Denville Scientific, Holliston, MA). Data shown are from a single  
448 representative experiment from 3 biological replicates.

449 For virus pull-down we incubated 10  $\mu$ g of purified virus +/- 50  $\mu$ g/ml heparin in TNE buffer  
450 with 1% BSA. Complexes were collected by incubation with 50  $\mu$ l heparin or protein A beads  
451 (4°C rotating for 2h), and washed 5 times in TNE buffer. Bound virions were eluted and  
452 analyzed by Western blot as described above. Membranes were blotted with antibodies against  
453 HERV-K Env, VSVG (1:10,000; V5507, Sigma-Aldrich), or VSVM (1:5000; 23H12, a kind gift from  
454 Doug Lyles[62]) followed by goat anti-mouse HRP antibody (1:5000; Sigma-Aldrich).  
455 Membranes were incubated with ECL reagent and signal was detected by film. Data shown are  
456 from a single representative experiment from 3 biological replicates.

#### 457 **Generation and characterization of HERV-K Env truncations.**

458 N-terminal truncations (N1-N7) were designed as outlined in S5 Fig to determine the  
459 appropriate boundary between the signal peptide and SU domain. DNA fragments containing  
460 the truncated versions of the envelope were cloned into a modified pVRC8400 expression  
461 vector, which uses tissue plasminogen activator signal sequence [63]. These *env* sequences with  
462 the new signal peptide were sub-cloned into pGEM3, under the control of a T7 polymerase  
463 promoter. Env truncations were screened for expression, proteolytic processing, fusogenicity,  
464 and pH dependency of fusion. Each screening experiment was a single replicate. Western blot  
465 analysis and cell-cell fusion experiments were performed as described [10]. Briefly, BSRT7 cells

466 were infected with VVT7.3 [64], a vaccinia virus encoding the T7 RNA polymerase as source of  
467 transcriptase. The cells were subsequently transfected with the HERV-K *env* expression  
468 plasmids or an empty vector control. At 18h post-transfection, cells were either harvested for  
469 Western blot analysis against HERV-K Env TM subunit (Austral biological) and Actin (Abcam), or  
470 treated with phosphate-buffered saline (PBS) at the indicated pH for 20 min at 37°C, at which  
471 point the cells were washed and standard growth medium was added. The cells were incubated  
472 for 4 h at 37°C and subsequently imaged. Truncations N4 and N5 had similar expression,  
473 processing, fusogenicity, and pH-dependency as WT.

474 C-terminal truncations based on N4 and N5 were tagged with a C-terminal HA tag, 3C  
475 protease cleavage site, and a tandem His<sub>8X</sub>-His<sub>6X</sub> tag and cloned into pVRC8400. Recombinant  
476 protein was produced by transient transfection of 293T cells using Lipofectamine 2000 (Life  
477 Technologies), per manufacturer's protocol. Three days post-transfection supernatants were  
478 harvested and clarified from cellular debris by low-speed centrifugation. HERV-K SU was  
479 purified by passage over Co-NTA agarose (Clontech) and concentrated with an Amicon Ultra-4  
480 filter (Millipore, Billerica, MA). Purified protein was run on both reducing and non-reducing  
481 SDS-PAGE (4-20% polyacrylamide gel, 4561096; Bio-rad, Hercules, CA) followed by Coomassie  
482 staining. Proteins were screened for the following criteria: 1. Expression: If a band of  
483 appropriate size was observed on a reducing gel. 2. Solubility: the absence of major aggregate  
484 bands under non-reducing conditions. 3. Monomeric: only proteins without evidence of major  
485 aggregation were subject to size exclusion chromatography. Proteins for which a discrete peak  
486 in the A280 trace corresponding to the approximate size of monomeric SU and produced a  
487 single band of the appropriate size on a non-reducing SDS-PAGE were deemed to produce



488 monomeric species.

#### 489 **Production of soluble HERV-K SU.**

490 A truncated version of the codon optimized HERV-K Phoenix SU domain, encoding  
491 residues 96-433 (residue 1 being the initiating methionine) was synthesized by Integrated DNA  
492 Technologies, Inc. to include a C-terminal HA tag, 3C protease cleavage site, and a tandem  
493 His<sub>8x</sub>-His<sub>6x</sub> tag. This cDNA was cloned into the modified pVRC8400 expression vector [63].  
494 Recombinant protein was produced by transient transfection of 293T cells using Lipofectamine  
495 2000 (Life Technologies), per manufacturer's protocol. At 3 days post-transfection supernatants  
496 were harvested and clarified from cellular debris by low-speed centrifugation and HERV-K SU  
497 purified by passage over Co-NTA agarose (Clontech) followed by gel filtration chromatography  
498 on Superdex 200 (General Electric Healthcare, Piscataway, NJ) in 10 mM Tris-HCl, 150 mM NaCl  
499 at pH 7.5. Three major peaks were observed: an aggregate of SU that eluted in the void volume  
500 of the column, a dimeric species that could be reduced into monomers by addition of a  
501 reducing agent (likely the result of a disulfide bond linking two monomers), and a major peak  
502 containing a homogeneous monomeric species. For binding assays, only gel filtration  
503 chromatography fractions containing the monomeric species were used.

#### 504 **Purification of recombinant HA.**

505 The hemagglutinin (HA) gene of Influenza A virus A/Leningrad/360/1986(H3N2) HA  
506 (Accession number CY121277) was synthesized as a gBlock (Integrated DNA Technologies, Inc.,  
507 Coralville, IA) and used as a template to amplify the globular head of HA, residues 37-319 (Hong  
508 Kong 1968 H3N2 numbering). The resulting PCR product was cloned and expressed from a

509 baculovirus recombinant as previously described [63]. The HA head was purified by passage  
510 over Co-NTA agarose (Clontech) followed by gel filtration chromatography on Superdex 200 (GE  
511 Healthcare) in 10 mM Tris-HCl, 150 mM NaCl at pH 7.5.

#### 512 **Heparin pull downs with purified SU.**

513 Briefly, 3 µg of HERV-K SU or HA was pre-incubated with 50 µg/ml heparin, heparan  
514 sulfate, condriotin sulfate A, dermatan sulfate, 2-O-desulfated heparin (AMSDSH001-2; AMS  
515 Bioscience), 6-O-desulfated heparin (AMSDSH002-6; AMS Bioscience), or no compound in 10  
516 mMTris-HCl, 150 mM NaCl, 0.2% TritonX-100 for 1 h at 4°C, and subsequently mixed with 50 ul  
517 of heparin, protein A or cobalt beads prior to incubation for 2 h at 4°C. Beads were washed 5  
518 times, bound proteins eluted as above, separated on a 4-20% acrylamide gel (Bio-rad) and  
519 transferred to nitrocellulose membranes. Membranes were blotted with an antibody against  
520 the HA tag (1:5000; Abcam) followed by anti-rabbit HRP antibody (1:5000; Sigma-Aldrich). Data  
521 shown are representative of 3 (Fig 3C) or 2 (Fig 3D) independent biological replicates.

#### 522 **Low pH inactivation of virions.**

523 Virus was incubated in buffer (10mM Na<sub>2</sub>HPO<sub>4</sub>, 10mM HEPES, 10mM MES) at various  
524 pH (7.0, 6.4, 6.0, 5.6, and 5.2) for 30 min at 37°C. pH was neutralized by adding an excess of  
525 DMEM+10% FBS and residual viral infectivity determined by infection of BSRT7 cells. Cells were  
526 collected 5 hpi, fixed in 2% PFA and eGFP fluorescence measured using a FACSCalibur  
527 instrument. The % of eGFP-positive cells was quantified using FlowJo software and normalized  
528 to pH7 treatment controls. Error bars represent standard error of the mean from 3  
529 independent biological replicates.

530 **Acid bypass of endocytosis.**

531 BSRT7 cells were treated with 100nM bafilomycin A1 (Sigma-Aldrich; B1793) for 30 min  
532 at 37°C and VSV or VSV-HERVK subsequently bound by incubating cells with virus an MOI of 5  
533 PFU/cell. for 1h at 4°C. Bound virus was then pulsed with buffer (10mM Na<sub>2</sub>HPO<sub>4</sub>, 10mM  
534 HEPES, 10mM MES) at either pH 7 or pH 5 for 10 min at 37°C, cells were washed twice and then  
535 incubated with DMEM (+/- 100nM bafilomycin A1). At 6 hpi cells were collected, fixed in 2%  
536 PFA and eGFP fluorescence measured as above. The % eGFP-positive cells in Bafilomycin  
537 treated cells is expressed relative to untreated cells. Error bars represent standard error of the  
538 mean from three independent biological replicates.

539 **Cell-cell fusion experiments.**

540 Cell-cell fusion experiments were performed as previously described [10]. Briefly, BSRT7  
541 cells were infected with VTF7-3 [64], transfected with pGEM plasmids encoding the *env* of  
542 Phoenix, Xq21.33, or HERV-K 108 or empty vector and treated with a 20 min pulse of DMEM of  
543 varying pH at 18h post-transfection. Cells were washed, and incubated for 4h at 37°C in DMEM.  
544 Cells were fixed in cold methanol prior to Giemsa staining according to manufacturer's protocol  
545 (Sigma-Aldrich). Data shown are from a single representative experiment from three biological  
546 replicates.

547 **Lentiviral pseudotypes infections.**

548 Lentiviruses pseudotypes were generated by transfecting 293T cells with pCD/NL-  
549 BH\*DDD, pNL-EGFP/CMV-WPREDU3 [65], and either pCAGGS-PhoenixEnv, pCAGGS-VSVG, or

550 pCAGGS empty vector (to generate bald particles). Supernatant was collected 48 hours post  
551 transfection and particle concentration was determined using a p24 (HIV-1) antigen capture kit  
552 from Advanced Bioscience Labs (Rockville, MD). Supernatant volumes were equilibrated to  
553 equal particle amounts, based on p24 values, of each pseudotype virus were used to infect  
554 293T, 293T-*B4GALT7*<sup>KO</sup>, CRFK and CRFK cells treated with 50mM NaClO<sub>3</sub> for two passages prior  
555 to infection. Supernatant was removed from cells 24 hours post infection and cells were  
556 collected 48 hours post infection. For NaClO<sub>3</sub> treated cells, NaClO<sub>3</sub> was present during the  
557 infection and subsequent incubation. eGFP fluorescence was measured using a FACSCalibur  
558 instrument and the percentage of eGFP-positive cells, as well as mean fluorescence intensity  
559 was quantified using FlowJo software. Error bars represent standard error of the mean from  
560 three independent biological replicates.

## 561 **Acknowledgments**

562 We thank T.R. Brummelkamp for providing critical reagents and facilities as well as critical  
563 comments on this manuscript.

## References

- 564  
565
- 566 1. Lander ES, Linton LM, Birren B, Nusbaum C, Zody MC, Baldwin J, et al. Initial sequencing  
567 and analysis of the human genome. *Nature*. 2001;409(6822):860-921. doi: 10.1038/35057062.  
568 PubMed PMID: 11237011.
  - 569 2. Subramanian RP, Wildschutte JH, Russo C, Coffin JM. Identification, characterization,  
570 and comparative genomic distribution of the HERV-K (HML-2) group of human endogenous  
571 retroviruses. *Retrovirology*. 2011;8:90. doi: 10.1186/1742-4690-8-90.
  - 572 3. Steinhuber S, Brack M, Hunsmann G, Schwelberger H, Dierich MP, Vogetseder W.  
573 Distribution of human endogenous retrovirus HERV-K genomes in humans and different  
574 primates. *Human genetics*. 1995;96(2):188-92. PubMed PMID: 7635468.
  - 575 4. Turner G, Barbulescu M, Su M, Jensen-Seaman MI, Kidd KK, Lenz J. Insertional  
576 polymorphisms of full-length endogenous retroviruses in humans. *Curr Biol*. 2001;11(19):1531-  
577 5. PubMed PMID: 11591322.
  - 578 5. Wildschutte JH, Williams ZH, Montesion M, Subramanian RP, Kidd JM, Coffin JM.  
579 Discovery of unfixed endogenous retrovirus insertions in diverse human populations. *Proc Natl*  
580 *Acad Sci U S A*. 2016. doi: 10.1073/pnas.1602336113. PubMed PMID: 27001843.
  - 581 6. Hanke K, Hohn O, Bannert N. HERV-K(HML-2), a seemingly silent subtenant - but still  
582 waters run deep. *APMIS : acta pathologica, microbiologica, et immunologica Scandinavica*.  
583 2016;124(1-2):67-87. doi: 10.1111/apm.12475. PubMed PMID: 26818263.
  - 584 7. Dewannieux M, Blaise S, Heidmann T. Identification of a functional envelope protein  
585 from the HERV-K family of human endogenous retroviruses. *J Virol*. 2005;79(24):15573-7. Epub  
586 2005/11/25. doi: 79/24/15573 [pii]  
587 10.1128/JVI.79.24.15573-15577.2005. PubMed PMID: 16306628.
  - 588 8. Dewannieux M, Harper F, Richaud A, Letzelter C, Ribet D, Pierron G, et al. Identification  
589 of an infectious progenitor for the multiple-copy HERV-K human endogenous retroelements.  
590 *Genome Res*. 2006;16(12):1548-56. Epub 2006/11/02. doi: gr.5565706 [pii]  
591 10.1101/gr.5565706. PubMed PMID: 17077319.
  - 592 9. Lee YN, Bieniasz PD. Reconstitution of an infectious human endogenous retrovirus. *PLoS*  
593 *Pathog*. 2007;3(1):e10. Epub 2007/01/30. doi: 06-PLPA-RA-0426R2 [pii]  
594 10.1371/journal.ppat.0030010. PubMed PMID: 17257061.
  - 595 10. Robinson LR, Whelan SP. Infectious Entry Pathway Mediated by the Human Endogenous  
596 Retrovirus K Envelope Protein. *J Virol*. 2016;90(7):3640-9. doi: 10.1128/JVI.03136-15. PubMed  
597 PMID: 26792739; PubMed Central PMCID: PMC4794671.
  - 598 11. Kramer P, Lausch V, Volkwein A, Hanke K, Hohn O, Bannert N. The human endogenous  
599 retrovirus K(HML-2) has a broad envelope-mediated cellular tropism and is prone to inhibition  
600 at a post-entry, pre-integration step. *Virology*. 2015;487:121-8. doi:  
601 10.1016/j.virol.2015.10.014. PubMed PMID: 26517399.
  - 602 12. Carette JE, Raaben M, Wong AC, Herbert AS, Obernosterer G, Mulherkar N, et al. Ebola  
603 virus entry requires the cholesterol transporter Niemann-Pick C1. *Nature*. 2011;477(7364):340-  
604 3. Epub 2011/08/26. doi: nature10348 [pii]  
605 10.1038/nature10348. PubMed PMID: 21866103.

- 606 13. Jae LT, Raaben M, Riemersma M, Beusekom E, Blomen VA, Velds A, et al. Deciphering  
607 the glycosylome of dystroglycanopathies using haploid screens for lassa virus entry. *Science*.  
608 2013;340(6131):479-83. doi: 10.1126/science.1233675.
- 609 14. Jae LT, Raaben M, Herbert AS, Kuehne AI, Wirchnianski AS, Soh TK, et al. Virus entry.  
610 Lassa virus entry requires a trigger-induced receptor switch. *Science (New York, NY)*.  
611 2014;344(6191):1506-10. doi: 10.1126/science.1252480.
- 612 15. Raaben M, Jae LT, Herbert AS, Kuehne AI, Stubbs SH, Chou YY, et al. NRP2 and CD63 Are  
613 Host Factors for Lujo Virus Cell Entry. *Cell host & microbe*. 2017;22(5):688-96 e5. doi:  
614 10.1016/j.chom.2017.10.002. PubMed PMID: 29120745.
- 615 16. Kleinfelter LM, Jangra RK, Jae LT, Herbert AS, Mittler E, Stiles KM, et al. Haploid Genetic  
616 Screen Reveals a Profound and Direct Dependence on Cholesterol for Hantavirus Membrane  
617 Fusion. *MBio*. 2015;6(4):e00801. doi: 10.1128/mBio.00801-15. PubMed PMID: 26126854;  
618 PubMed Central PMCID: PMC4488941.
- 619 17. Riblett AM, Blomen VA, Jae LT, Altamura LA, Doms RW, Brummelkamp TR, et al. A  
620 Haploid Genetic Screen Identifies Heparan Sulfate Proteoglycans Supporting Rift Valley Fever  
621 Virus Infection. *J Virol*. 2015;90(3):1414-23. doi: 10.1128/JVI.02055-15. PubMed PMID:  
622 26581979; PubMed Central PMCID: PMC4719632.
- 623 18. Prydz K. Determinants of Glycosaminoglycan (GAG) Structure. *Biomolecules*.  
624 2015;5(3):2003-22. doi: 10.3390/biom5032003. PubMed PMID: 26308067; PubMed Central  
625 PMCID: PMC4598785.
- 626 19. Shieh MT, WuDunn D, Montgomery RI, Esko JD, Spear PG. Cell surface receptors for  
627 herpes simplex virus are heparan sulfate proteoglycans. *J Cell Biol*. 1992;116(5):1273-81.  
628 PubMed PMID: 1310996; PubMed Central PMCID: PMC2289355.
- 629 20. Gardner CL, Ebel GD, Ryman KD, Klimstra WB. Heparan sulfate binding by natural  
630 eastern equine encephalitis viruses promotes neurovirulence. *Proc Natl Acad Sci U S A*.  
631 2011;108(38):16026-31. doi: 10.1073/pnas.1110617108. PubMed PMID: 21896745; PubMed  
632 Central PMCID: PMC3179095.
- 633 21. Cote M, Zheng YM, Liu SL. Receptor binding and low pH coactivate oncogenic retrovirus  
634 envelope-mediated fusion. *J Virol*. 2009;83(22):11447-55. doi: 10.1128/JVI.00748-09. PubMed  
635 PMID: 19726505; PubMed Central PMCID: PMC2772678.
- 636 22. Wang E, Obeng-Adjei N, Ying Q, Meertens L, Dragic T, Davey RA, et al. Mouse mammary  
637 tumor virus uses mouse but not human transferrin receptor 1 to reach a low pH compartment  
638 and infect cells. *Virology*. 2008;381(2):230-40. doi: 10.1016/j.virol.2008.08.013.
- 639 23. Côté M, Kucharski TJ, Liu S-LL. Enzootic nasal tumor virus envelope requires a very acidic  
640 pH for fusion activation and infection. *Journal of virology*. 2008;82(18):9023-34. doi:  
641 10.1128/JVI.00648-08.
- 642 24. Mothes W, Boerger AL, Narayan S, Cunningham JM, Young JA. Retroviral entry mediated  
643 by receptor priming and low pH triggering of an envelope glycoprotein. *Cell*. 2000;103(4):679-  
644 89. PubMed PMID: 11106737.
- 645 25. Doms RW, Keller DS, Helenius A, Balch WE. Role for adenosine triphosphate in  
646 regulating the assembly and transport of vesicular stomatitis virus G protein trimers. *J Cell Biol*.  
647 1987;105(5):1957-69. PubMed PMID: 2824524; PubMed Central PMCID: PMC42114842.

- 648 26. Puri A, Winick J, Lowy RJ, Covell D, Eidelman O, Walter A, et al. Activation of vesicular  
649 stomatitis virus fusion with cells by pretreatment at low pH. *J Biol Chem.* 1988;263(10):4749-53.  
650 PubMed PMID: 2832405.
- 651 27. Gaudin Y, Tuffereau C, Segretain D, Knossow M, Flamand A. Reversible conformational  
652 changes and fusion activity of rabies virus glycoprotein. *J Virol.* 1991;65(9):4853-9. PubMed  
653 PMID: 1870204; PubMed Central PMCID: PMCPMC248944.
- 654 28. Mayer J, Sauter M, Racz A, Scherer D, Mueller-Lantsch N, Meese E. An almost-intact  
655 human endogenous retrovirus K on human chromosome 7. *Nat Genet.* 1999;21(3):257-8. doi:  
656 10.1038/6766. PubMed PMID: 10080172.
- 657 29. Nasimuzzaman M, Persons DA. Cell Membrane-associated heparan sulfate is a receptor  
658 for prototype foamy virus in human, monkey, and rodent cells. *Molecular therapy : the journal*  
659 *of the American Society of Gene Therapy.* 2012;20(6):1158-66. doi: 10.1038/mt.2012.41.  
660 PubMed PMID: 22434139; PubMed Central PMCID: PMC3369305.
- 661 30. Plochmann K, Horn A, Gschmack E, Armbruster N, Krieg J, Wiktorowicz T, et al. Heparan  
662 sulfate is an attachment factor for foamy virus entry. *J Virol.* 2012;86(18):10028-35. doi:  
663 10.1128/JVI.00051-12. PubMed PMID: 22787203; PubMed Central PMCID: PMC3446549.
- 664 31. Picard-Maureau M, Jarmy G, Berg A, Rethwilm A, Lindemann D. Foamy virus envelope  
665 glycoprotein-mediated entry involves a pH-dependent fusion process. *J Virol.* 2003;77(8):4722-  
666 30. PubMed PMID: 12663779; PubMed Central PMCID: PMC152125.
- 667 32. Zhang Y, Rassa JC, deObaldia ME, Albritton LM, Ross SR. Identification of the receptor  
668 binding domain of the mouse mammary tumor virus envelope protein. *Journal of virology.*  
669 2003;77(19):10468-78. doi: 10.1128/JVI.77.19.10468-10478.2003.
- 670 33. Lambert S, Bouttier M, Vassy R, Seigneuret M, Petrow-Sadowski C, Janvier S, et al. HTLV-  
671 1 uses HSPG and neuropilin-1 for entry by molecular mimicry of VEGF165. *Blood.*  
672 2009;113(21):5176-85. doi: 10.1182/blood-2008-04-150342. PubMed PMID: 19270265;  
673 PubMed Central PMCID: PMC2686187.
- 674 34. Manel N, Kim FJ, Kinet S, Taylor N, Sitbon M, Battini JL. The ubiquitous glucose  
675 transporter GLUT-1 is a receptor for HTLV. *Cell.* 2003;115(4):449-59. PubMed PMID: 14622599.
- 676 35. Briggs JA, Watson BE, Gowen BE, Fuller SD. Cryoelectron microscopy of mouse  
677 mammary tumor virus. *J Virol.* 2004;78(5):2606-8. Epub 2004/02/14. PubMed PMID: 14963166;  
678 PubMed Central PMCID: PMCPMC369243.
- 679 36. Grow EJ, Flynn RA, Chavez SL, Bayless NL, Wossidlo M, Wesche DJ, et al. Intrinsic  
680 retroviral reactivation in human preimplantation embryos and pluripotent cells. *Nature.*  
681 2015;522(7555):221-5. doi: 10.1038/nature14308. PubMed PMID: 25896322; PubMed Central  
682 PMCID: PMC4503379.
- 683 37. Iozzo RV, Sanderson RD. Proteoglycans in cancer biology, tumour microenvironment and  
684 angiogenesis. *Journal of cellular and molecular medicine.* 2011;15(5):1013-31. doi:  
685 10.1111/j.1582-4934.2010.01236.x. PubMed PMID: 21155971; PubMed Central PMCID:  
686 PMC3633488.
- 687 38. Whitelock JM, Melrose J, Iozzo RV. Diverse cell signaling events modulated by perlecan.  
688 *Biochemistry.* 2008;47(43):11174-83. doi: 10.1021/bi8013938. PubMed PMID: 18826258;  
689 PubMed Central PMCID: PMC2605657.

- 690 39. Lindahl U, Li JP. Interactions between heparan sulfate and proteins-design and  
691 functional implications. *International review of cell and molecular biology*. 2009;276:105-59.  
692 doi: 10.1016/S1937-6448(09)76003-4. PubMed PMID: 19584012.
- 693 40. Hacker U, Nybakken K, Perrimon N. Heparan sulphate proteoglycans: the sweet side of  
694 development. *Nature reviews Molecular cell biology*. 2005;6(7):530-41. doi: 10.1038/nrm1681.  
695 PubMed PMID: 16072037.
- 696 41. Lavalie C, Cornelis G, Dupressoir A, Esnault C, Heidmann O, Vernochet C, et al.  
697 Paleovirology of 'syncytins', retroviral env genes exapted for a role in placentation.  
698 *Philosophical transactions of the Royal Society of London Series B, Biological sciences*.  
699 2013;368(1626):20120507. doi: 10.1098/rstb.2012.0507.
- 700 42. Blanco-Melo D, Gifford RJ, Bieniasz PD. Co-option of an endogenous retrovirus envelope  
701 for host defense in hominid ancestors. *eLife*. 2017;6. doi: 10.7554/eLife.22519. PubMed PMID:  
702 28397686; PubMed Central PMCID: PMC5388530.
- 703 43. Heidmann O, Beguin A, Paternina J, Berthier R, Deloger M, Bawa O, et al. HEMO, an  
704 ancestral endogenous retroviral envelope protein shed in the blood of pregnant women and  
705 expressed in pluripotent stem cells and tumors. *Proc Natl Acad Sci U S A*. 2017;114(32):E6642-  
706 E51. doi: 10.1073/pnas.1702204114. PubMed PMID: 28739914; PubMed Central PMCID:  
707 PMC5559007.
- 708 44. Fuchs NV, Loewer S, Daley GQ, Izsvak Z, Lower J, Lower R. Human endogenous retrovirus  
709 K (HML-2) RNA and protein expression is a marker for human embryonic and induced  
710 pluripotent stem cells. *Retrovirology*. 2013;10:115. doi: 10.1186/1742-4690-10-115. PubMed  
711 PMID: 24156636; PubMed Central PMCID: PMC3819666.
- 712 45. Ross SR, Schofield JJ, Farr CJ, Bucan M. Mouse transferrin receptor 1 is the cell entry  
713 receptor for mouse mammary tumor virus. *Proceedings of the National Academy of Sciences of  
714 the United States of America*. 2002;99(19):12386-90. doi: 10.1073/pnas.192360099.
- 715 46. Miller AD, Bergholz U, Ziegler M, Stocking C. Identification of the myelin protein  
716 plasmolipin as the cell entry receptor for *Mus caroli* endogenous retrovirus. *J Virol*.  
717 2008;82(14):6862-8. doi: 10.1128/JVI.00397-08. PubMed PMID: 18463156; PubMed Central  
718 PMCID: PMC2446966.
- 719 47. Taylor CS, Nouri A, Lee CG, Kozak C, Kabat D. Cloning and characterization of a cell  
720 surface receptor for xenotropic and polytropic murine leukemia viruses. *Proc Natl Acad Sci U S  
721 A*. 1999;96(3):927-32. PubMed PMID: 9927670; PubMed Central PMCID: PMC15327.
- 722 48. Albritton LM, Tseng L, Scadden D, Cunningham JM. A putative murine ecotropic  
723 retrovirus receptor gene encodes a multiple membrane-spanning protein and confers  
724 susceptibility to virus infection. *Cell*. 1989;57(4):659-66. PubMed PMID: 2541919.
- 725 49. Miller DG, Miller AD. A family of retroviruses that utilize related phosphate transporters  
726 for cell entry. *J Virol*. 1994;68(12):8270-6. PubMed PMID: 7966619; PubMed Central PMCID:  
727 PMC237294.
- 728 50. Miller DG, Edwards RH, Miller AD. Cloning of the cellular receptor for amphotropic  
729 murine retroviruses reveals homology to that for gibbon ape leukemia virus. *Proc Natl Acad Sci  
730 U S A*. 1994;91(1):78-82. PubMed PMID: 8278411; PubMed Central PMCID: PMC42889.
- 731 51. Hein S, Prassolov V, Zhang Y, Ivanov D, Lohler J, Ross SR, et al. Sodium-dependent myo-  
732 inositol transporter 1 is a cellular receptor for *Mus cervicolor* M813 murine leukemia virus. *J  
733 Virol*. 2003;77(10):5926-32. PubMed PMID: 12719585; PubMed Central PMCID: PMC154034.



- 734 52. Soll SJ, Neil SJ, Bieniasz PD. Identification of a receptor for an extinct virus. *Proc Natl*  
735 *Acad Sci U S A*. 2010;107(45):19496-501. doi: 10.1073/pnas.1012344107. PubMed PMID:  
736 20974973; PubMed Central PMCID: PMC2984158.
- 737 53. Buchholz UJ, Finke S, Conzelmann KK. Generation of bovine respiratory syncytial virus  
738 (BRSV) from cDNA: BRSV NS2 is not essential for virus replication in tissue culture, and the  
739 human RSV leader region acts as a functional BRSV genome promoter. *J Virol*. 1999;73(1):251-9.  
740 PubMed PMID: 9847328; PubMed Central PMCID: PMC103829.
- 741 54. Whelan SP, Barr JN, Wertz GW. Identification of a minimal size requirement for  
742 termination of vesicular stomatitis virus mRNA: implications for the mechanism of transcription.  
743 *Journal of virology*. 2000;74(18):8268-76.
- 744 55. Sanjana NE, Shalem O, Zhang F. Improved vectors and genome-wide libraries for CRISPR  
745 screening. *Nature methods*. 2014;11(8):783-4. doi: 10.1038/nmeth.3047. PubMed PMID:  
746 25075903; PubMed Central PMCID: PMC4486245.
- 747 56. Cong L, Ran FA, Cox D, Lin S, Barretto R, Habib N, et al. Multiplex genome engineering  
748 using CRISPR/Cas systems. *Science*. 2013;339(6121):819-23. doi: 10.1126/science.1231143.  
749 PubMed PMID: 23287718; PubMed Central PMCID: PMC3795411.
- 750 57. Lackner DH, Carre A, Guzzardo PM, Banning C, Mangena R, Henley T, et al. A generic  
751 strategy for CRISPR-Cas9-mediated gene tagging. *Nature communications*. 2015;6:10237. doi:  
752 10.1038/ncomms10237. PubMed PMID: 26674669; PubMed Central PMCID: PMC4703899.
- 753 58. Zhang XY, La Russa VF, Reiser J. Transduction of bone-marrow-derived mesenchymal  
754 stem cells by using lentivirus vectors pseudotyped with modified RD114 envelope  
755 glycoproteins. *J Virol*. 2004;78(3):1219-29. PubMed PMID: 14722277; PubMed Central PMCID:  
756 PMC321376.
- 757 59. Langereis MA, Rabouw HH, Holwerda M, Visser LJ, van Kuppeveld FJ. Knockout of cGAS  
758 and STING Rescues Virus Infection of Plasmid DNA-Transfected Cells. *J Virol*.  
759 2015;89(21):11169-73. doi: 10.1128/JVI.01781-15. PubMed PMID: 26311870; PubMed Central  
760 PMCID: PMCPMC4621133.
- 761 60. Yamashita M, Emerman M. Capsid is a dominant determinant of retrovirus infectivity in  
762 nondividing cells. *J Virol*. 2004;78(11):5670-8. doi: 10.1128/JVI.78.11.5670-5678.2004. PubMed  
763 PMID: 15140964; PubMed Central PMCID: PMC415837.
- 764 61. Cureton DK, Massol RH, Saffarian S, Kirchhausen TL, Whelan SP. Vesicular stomatitis  
765 virus enters cells through vesicles incompletely coated with clathrin that depend upon actin for  
766 internalization. *PLoS pathogens*. 2009;5(4). doi: 10.1371/journal.ppat.1000394.
- 767 62. Lyles DS, Puddington L, McCreedy BJ, Jr. Vesicular stomatitis virus M protein in the  
768 nuclei of infected cells. *J Virol*. 1988;62(11):4387-92. PubMed PMID: 2845149; PubMed Central  
769 PMCID: PMC253880.
- 770 63. Schmidt AG, Xu H, Khan AR, O'Donnell T, Khurana S, King LR, et al. Preconfiguration of  
771 the antigen-binding site during affinity maturation of a broadly neutralizing influenza virus  
772 antibody. *Proc Natl Acad Sci U S A*. 2013;110(1):264-9. doi: 10.1073/pnas.1218256109. PubMed  
773 PMID: 23175789; PubMed Central PMCID: PMC3538208.
- 774 64. Fuerst TR, Niles EG, Studier FW, Moss B. Eukaryotic transient-expression system based  
775 on recombinant vaccinia virus that synthesizes bacteriophage T7 RNA polymerase. *Proc Natl*  
776 *Acad Sci U S A*. 1986;83(21):8122-6. PubMed PMID: 3095828; PubMed Central PMCID:  
777 PMC386879.

778 65. Ricks DM, Kutner R, Zhang XY, Welsh DA, Reiser J. Optimized lentiviral transduction of  
779 mouse bone marrow-derived mesenchymal stem cells. *Stem cells and development*.  
780 2008;17(3):441-50. doi: 10.1089/scd.2007.0194. PubMed PMID: 18513160; PubMed Central  
781 PMCID: PMC2996877.  
782

783

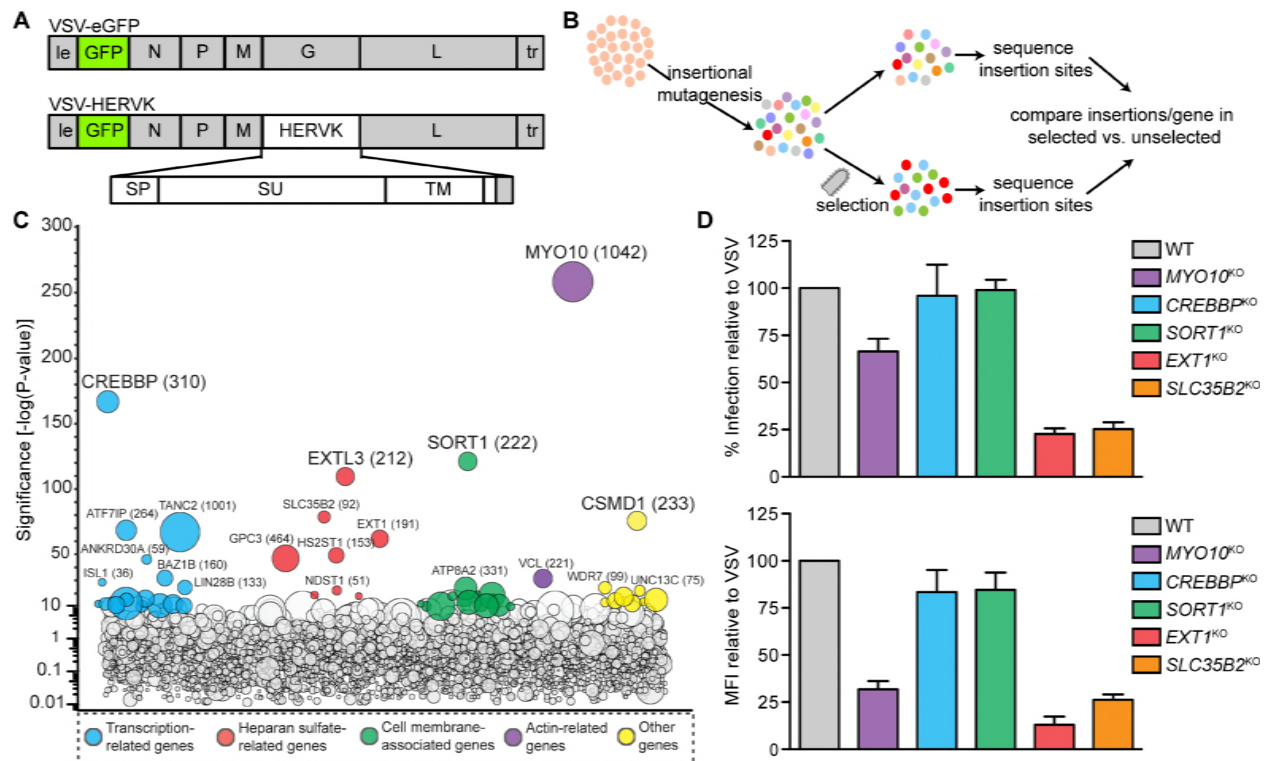

784 **Fig 1. Haploid genetic screen identifies host factors required for infection by VSV-HERVK. (A)**  
 785

786 Viral genome structures. Sequences from VSV are shown in grey: N, nucleocapsid; P,  
 787 phosphoprotein; M, matrix; G, glycoprotein; L, large polymerase. le: leader. tr: trailer. Viruses  
 788 also encode an eGFP reporter gene. VSV-HERVK encodes the HERVK glycoprotein, which  
 789 contains the signal peptide (SP), surface (SU) subunit, transmembrane subunit (TM), and  
 790 membrane-spanning domain of HERV-K env, and cytoplasmic tail of VSV G. **(B)** Schematic of  
 791 haploid genetic screen. HAP1 cells were subjected to insertional mutagenesis, followed by  
 792 selection with VSV-HERVK. Surviving cells were deep sequenced to identify the position of  
 793 insertion sites. The number of insertions per gene in the selected set was compared to that of  
 794 an unselected set to identify genes that were associated with survival of infection. **(C)** Screen  
 795 results. The y-axis indicates the significance of enrichment of gene-trap insertions compared  
 796 with unselected control cells. Circles represent individual genes and their size corresponds to

797 the number of unique insertion sites in the selected population. Genes with significance scores  
798 above 10 are colored according to function and grouped horizontally. Genes with significance  
799 score above 25 are labeled. **(D)** HAP1 cells were gene edited to lack the indicated genes and  
800 infected with VSV or VSV-HERVK. The fold difference in percent infected cells (top) and mean  
801 fluorescence intensity (MFI, bottom) of VSV-HERVK infected cells normalized to that of VSV is  
802 shown. Error bars represent standard error of the mean (SEM) for at least three independent  
803 experiments.

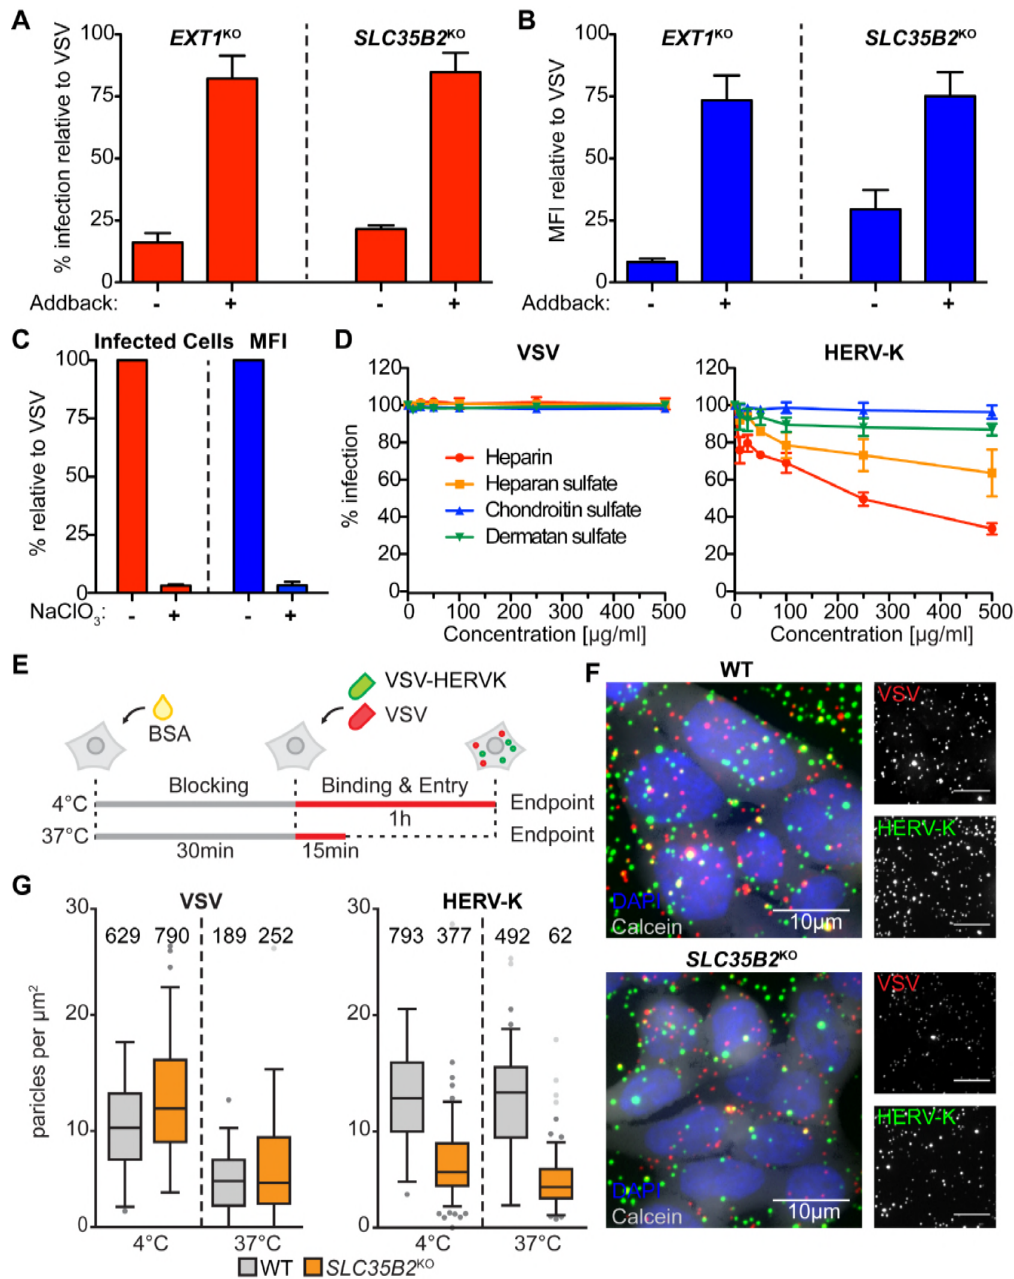

804

805 **Fig 2. Heparan sulfate facilitates HERV-K Env-mediated entry and attachment. (A)** WT HAP1,

806 *EXT1*<sup>KO</sup> Neo<sup>r</sup> Ctrl (transduced with a control retrovirus), *EXT1*<sup>KO</sup> EXT1-HA (+ addback), *SLC35B2*<sup>KO</sup>

807 Neo<sup>r</sup> Ctrl and *SLC35B2*<sup>KO</sup> SLC25B2-HA (+ addback) cells were infected with VSV-HERVK or VSV

808 and infectivity analyzed by flow cytometry. Fold difference in percent infected cells compared

809 to WT for VSV-HERVK was normalized to that of VSV for each condition. Error bars represent

810 SEM for four independent experiments. **(B)** Relative MFI of cells from (A). Data were normalized  
811 as in (A). **(C)** BSRT7 cells were treated with 50mM sodium chlorate and infected with either VSV  
812 or VSV-HERVK. Fold difference in both percent infected cells (left) and MFI (right) compared to  
813 untreated cells for VSV-HERVK was normalized to that of VSV. Error bars represent SEM for  
814 three independent experiments. **(D)** VSV or VSV-HERVK was incubated with the indicated  
815 soluble glycosaminoglycans prior to infecting BSRT7 cells. Percent infected cells was normalized  
816 to untreated virus controls. Error bars represent SEM for three independent experiments. **(E)**  
817 Schematic of virus attachment experiment. Cells were blocked with BSA then incubated with  
818 both fluorescently labeled VSV-HERVK and VSV at either 37°C or 4°C. **(F)** Representative images  
819 from 4°C attachment experiment. Red: VSV. Green: VSV-HERVK. Blue: DAPI. Grey: calcein. **(G)**  
820 Results of attachment experiment. Numbers of particles/ $\mu\text{m}^2$  are plotted. Grey circles indicate  
821 outliers. Total number of particles counted per condition is indicated above each box.

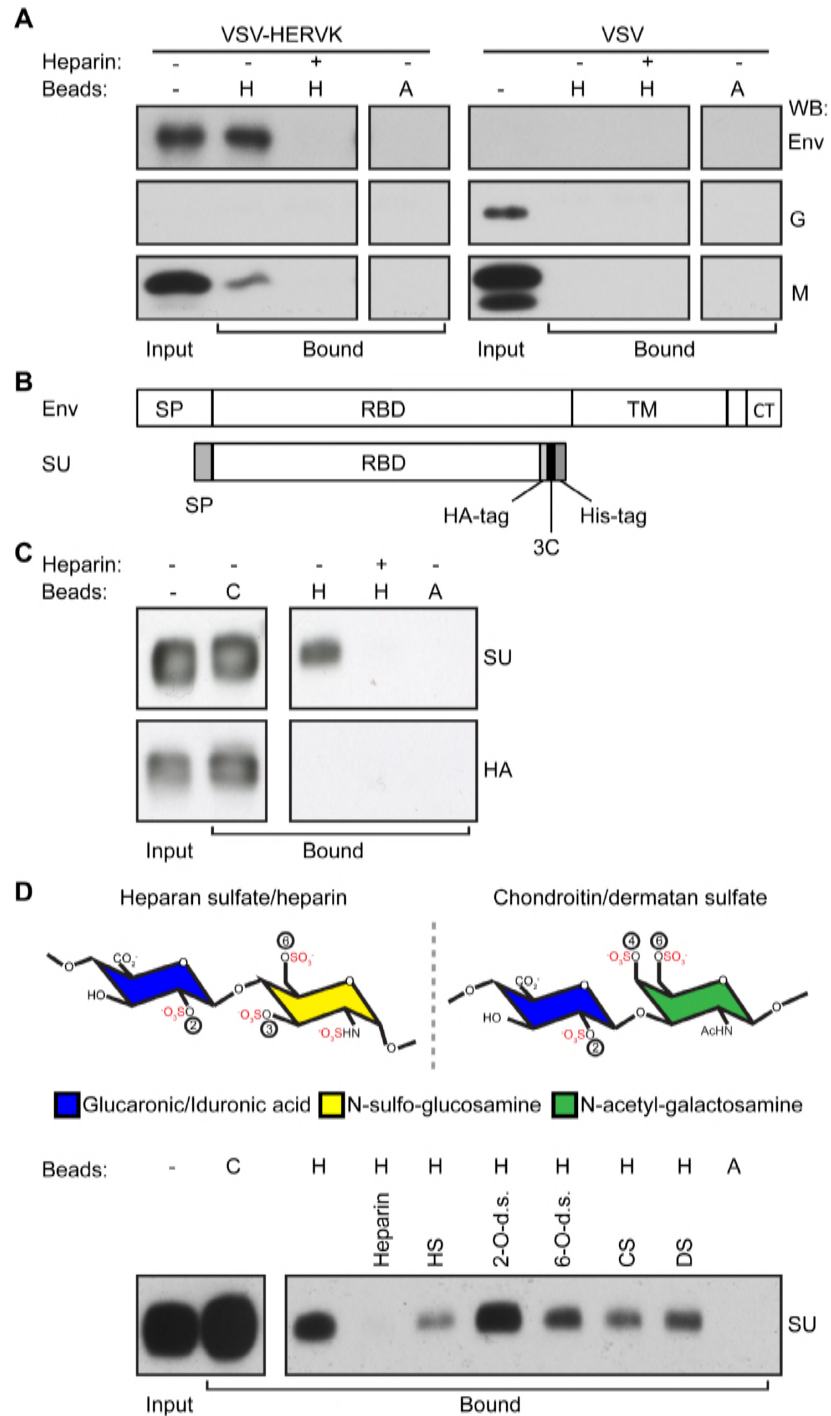

822

823 **Fig 3. HERV-K Env binds heparin.** (A) Purified VSV-HERVK or VSV were incubated with heparin  
 824 (H) or protein A (A) beads, with (+) or without (-) soluble heparin added as a competitor. Bound  
 825 virions were analyzed by Western blot against HERV-K Env, VSV G, and VSV M. Input: total input  
 826 virus. (B) Schematic of HERV-K Env and HERV-K SU used in this study. SP: signal peptide. RBD:

827 receptor binding domain. TM: transmembrane subunit. CT: cytoplasmic tail. 3C: 3C protease  
828 cleavage site. **(C)** HERV-K SU or Influenza A HA receptor binding domain (HA) were pre-  
829 incubated with or without soluble heparin prior to incubation with either cobalt (C, maximum  
830 pull-down control), heparin (H), or protein A (A) agarose beads. Bound protein was eluted from  
831 the beads and subjected to SDS-PAGE followed by Western blot against the HA tag. Input: 10%  
832 of total input protein. **(D)** Top: Structure of glycosaminoglycans. The repeating disaccharides of  
833 heparan sulfate/heparin (left) and chondroitin/dermatan sulfate (right) are shown. Sulfates are  
834 highlighted in red. Positions of O-sulfations are indicated with circled numbers. Disaccharides  
835 are shown as fully sulfated, however individual sugars will not always be sulfated at each  
836 position. Bottom: HERV-K SU was pre-incubated with soluble competitor compounds (heparin,  
837 heparan sulfate, 2-O-desulfated heparin, 6-O-desulfated heparin, chondroitin sulfate A, and  
838 dermatan sulfate) prior to incubation with either cobalt, heparin, or protein A agarose beads.  
839 Bound protein was eluted from the beads and subjected to SDS-PAGE followed by Western blot  
840 against the HA tag. Input: 10% of total input.



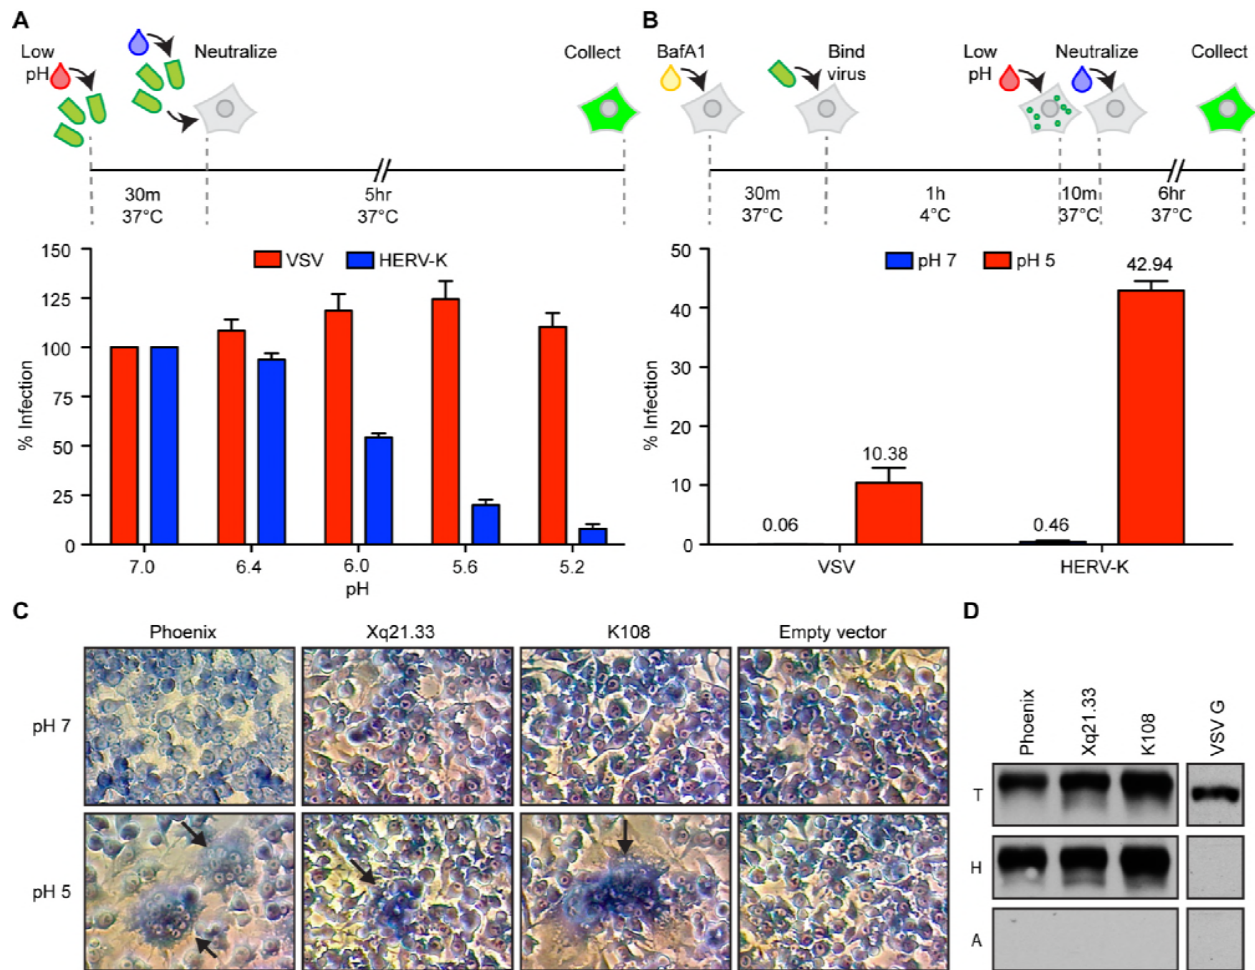

841

842 **Fig 4. Acidic pH is sufficient to trigger HERV-K Env. (A)** HERV-K Env is inactivated by exposure to

843 acidic pH. VSV-HERVK and VSV were incubated in buffer at the indicated pH for 30 minutes at

844 37°C. Samples were returned to neutral pH before infecting BSRT7 cells. Cells were collected 5

845 hours post infection and percent GFP-expressing cells quantified by flow cytometry. Values are

846 normalized to the pH 7 condition. Error bars represent SEM from three independent

847 experiments. **(B)** VSV-HERVK fuses at the plasma membrane when treated with acidic pH.

848 BSRT7 cells were pre-treated with bafilomycinA1 prior to binding virus at 4°C. Cells were

849 treated with buffer at pH 7 or 5. Unbound virus was washed off and cells were collected 6 hours

850 post-infection. Percent infected cells was normalized to cells not treated with bafilomycinA1.

851 Error bars represent SEM for three independent experiments. **(C)** Endogenous HERV-K Envs are  
852 fusogenic at acidic pH. BSRT7 cells were transfected with *envs* from Phoenix, Xq21.33, and  
853 HERV-K 108 and subsequently exposed to buffer at the indicated pH. Syncytia are highlighted  
854 with arrows. Data are from a single representative experiment. **(D)** Endogenous HERV-K Envs  
855 bind heparin. 293T cells were transfected with the *envs* from Phoenix, Xq21.33, HERV-K 108, or  
856 VSV-G. Cell lysates were incubated with either heparin (H) or protein A (A) beads and bound  
857 protein analyzed by Western blot against HERV-K Env and VSV-G. T: 10% of total input. Data are  
858 from a single representative experiments.

859

860

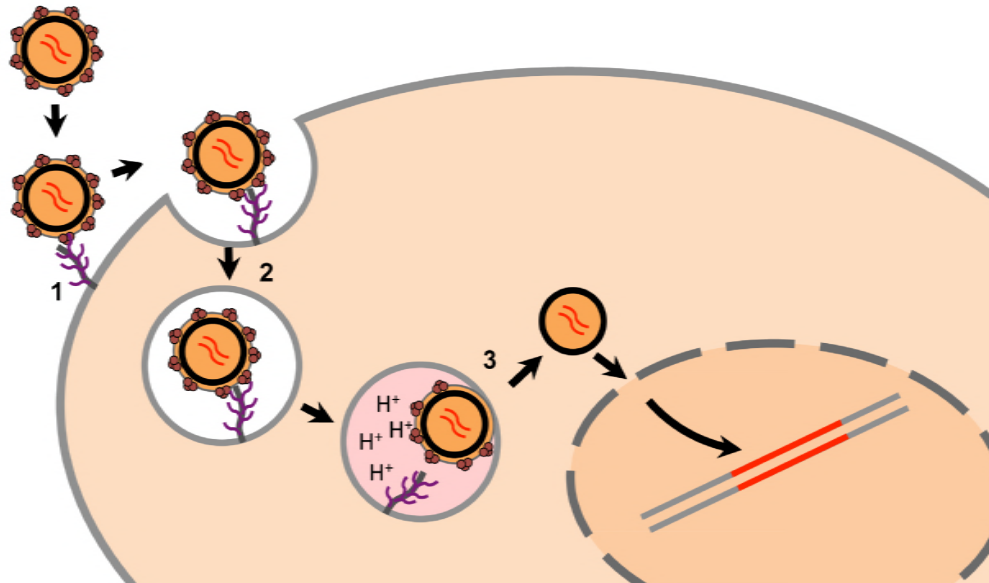

861

862 **Fig 5. Proposed model of HERV-K entry.** We propose a 3-step model for HERV-K entry: 1. HERV-  
863 K binds heparan sulfate on the cell surface to attach to the cell. 2. The virus is taken up by  
864 dynamin-dependent, clathrin-independent endocytosis. 3. Exposure to low pH following  
865 endosomal acidification triggers Env to fuse the viral and cellular membranes, releasing the viral  
866 core into the cytoplasm.

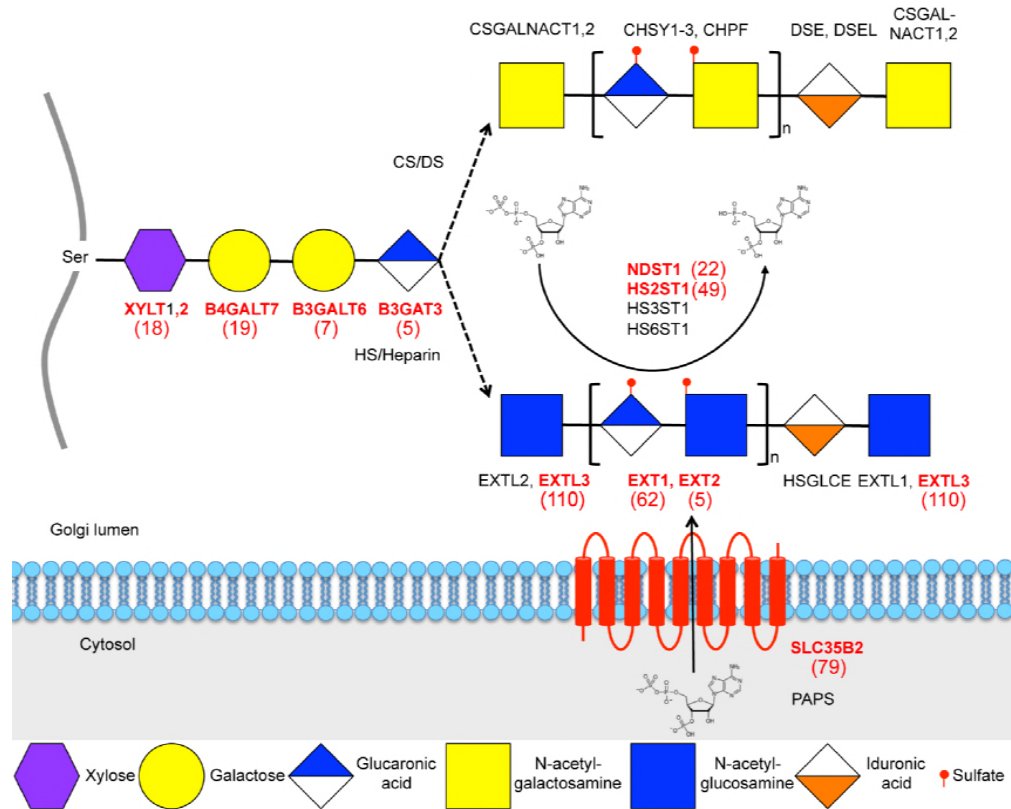

867

868 **S1 Fig. Cartoon schematic of the glycosaminoglycan (GAG) synthesis pathway.** GAGs are  
 869 added to a core protein (in grey). There is a core linkage of 4 sugars. The pathway then splits  
 870 into the heparan sulfate/heparin pathway and the chondroitin sulfate/dermatan sulfate  
 871 pathway. The enzymes that catalyze the sugar addition are written above/below the sugars.  
 872 Sulfation is catalyzed by enzymes NDST1, HS2ST1, HS3ST1, and HS6ST1-3. Each enzyme adds a  
 873 sulfate to a different position on the sugar. The sulfate donor, PAPS is transported into the  
 874 Golgi by SLC35B2. Genes highlighted in red were identified as hits in the haploid screen. The  
 875 significance score for each hit, rounded to the nearest integer, is indicated in parentheses.

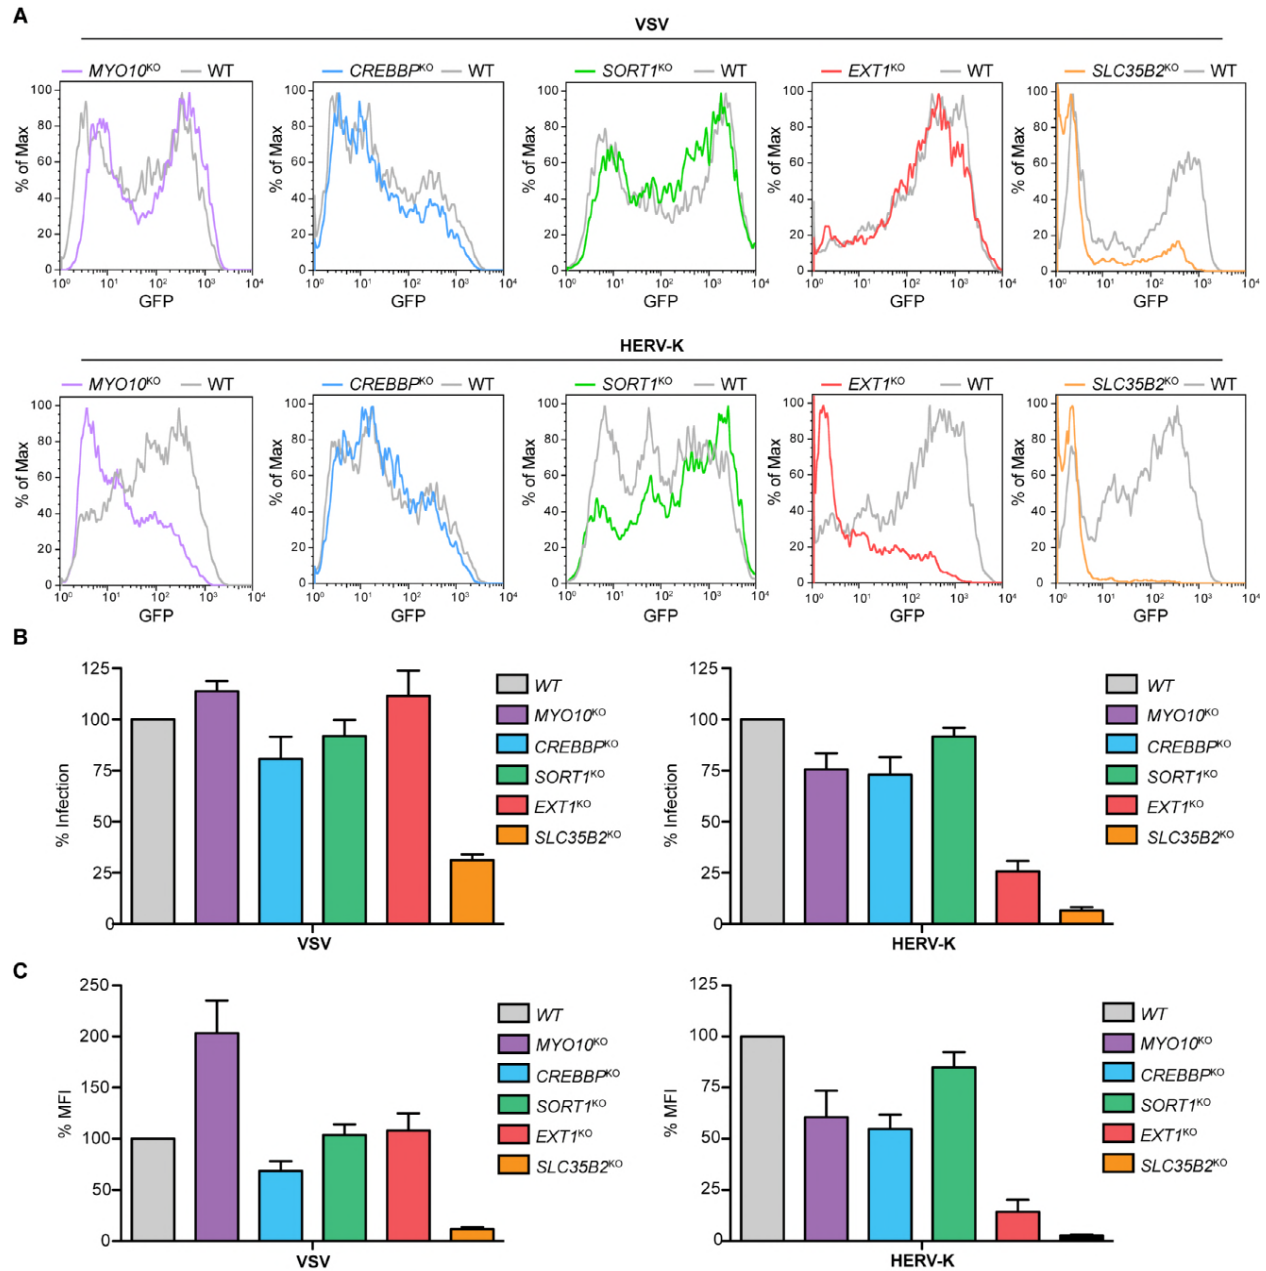

876

877

**S2 Fig. Histograms of GFP expression and infectivity in cells from Fig 1. (A)** Representative

878 histograms from experiments in Fig 1D. Top: VSV infected cells. Bottom: VSV-HERVK infected

879 cells. Histograms are from a single representative experiment. **(B)** Infectivity of VSV-

880 HERVK in gene edited cells. Data are from the same experiment as Fig 1D and are normalized to

881 infectivity in WT cells. **(C)** MFI of cells in (B). MFI of all cells for each condition are normalized to

882 that of WT cells.

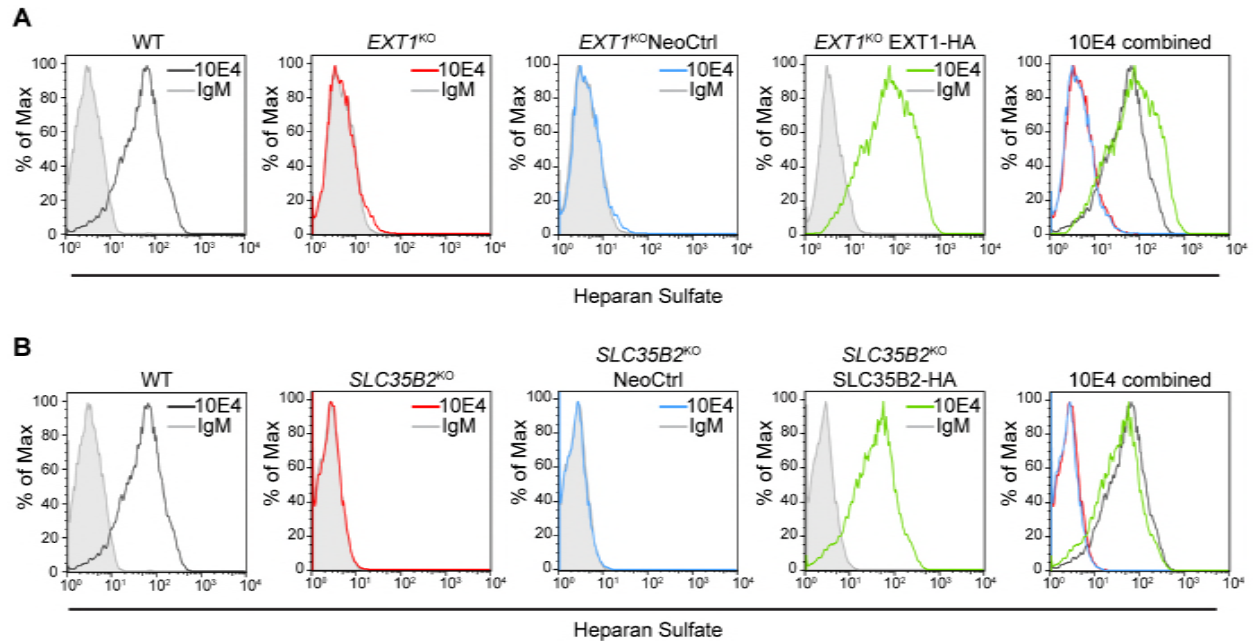

883

884 **S3 Fig. Heparan sulfate expression of *EXT1*<sup>KO</sup> and *SLC35B2*<sup>KO</sup> HAP1 cells.** The indicated cell lines

885 were stained with 10E4, a heparan sulfate-specific antibody, or mouse IgM isotype control

886 antibody, and analyzed by flow cytometry. **(A)** WT HAP1, *EXT1*<sup>KO</sup>, *EXT1*<sup>KO</sup>Neo<sup>r</sup> Control, and

887 *EXT1*<sup>KO</sup>+*EXT1*-HA cells. **(B)** WT HAP1, *SLC35B2*<sup>KO</sup>, *SLC35B2*<sup>KO</sup>Neo<sup>r</sup> Control, and

888 *SLC35B2*<sup>KO</sup>+*SLC35B2*-HA cells. Representative histograms are shown from a single experiment.

889 The WT histograms in (A) and (B) are the same sample and therefore identical. Histograms are

890 from a single representative experiment.

891

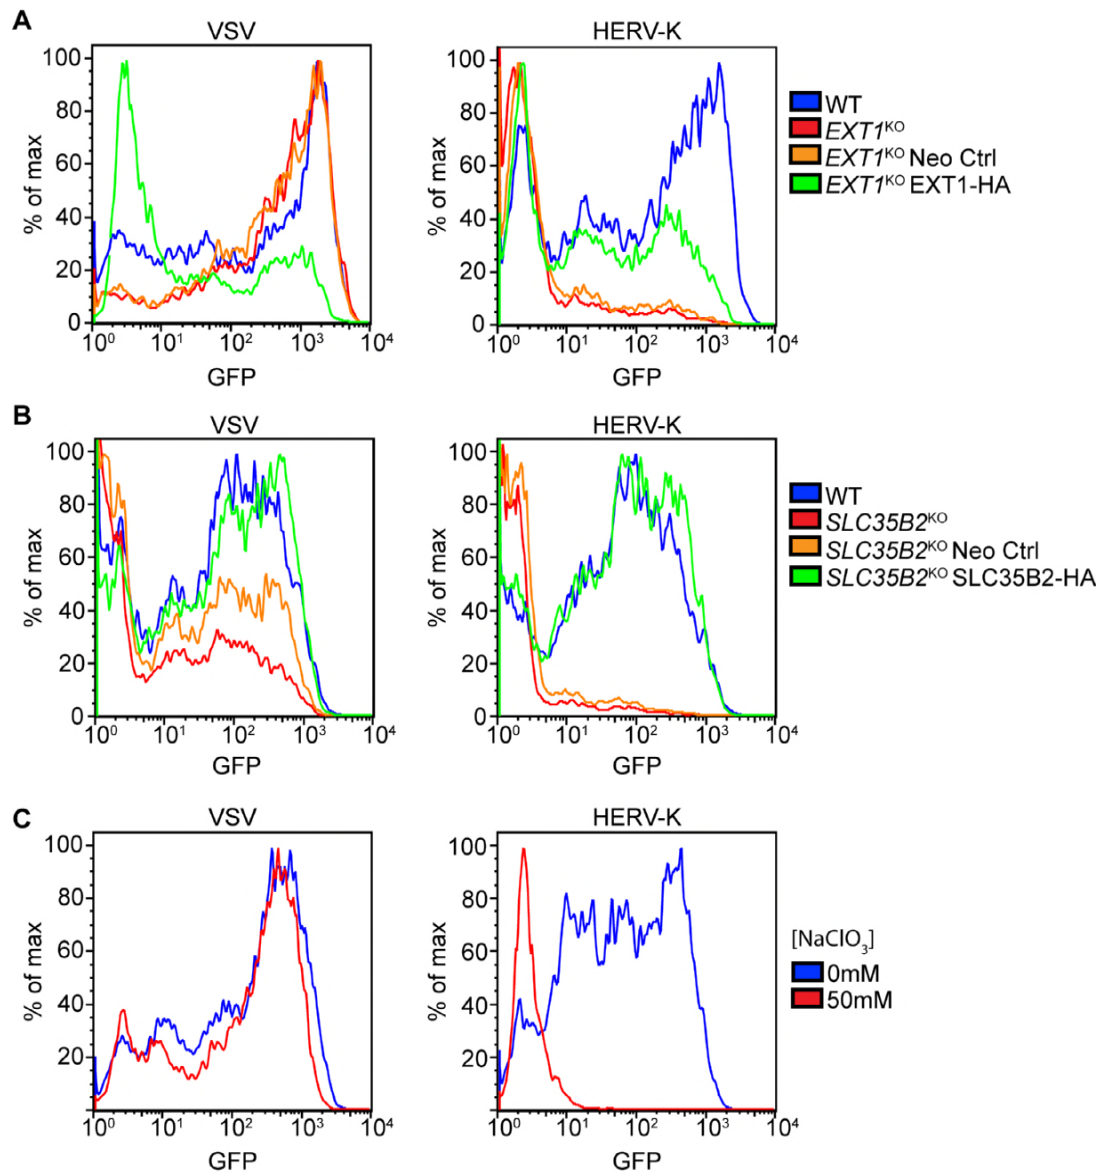

892

893 **S4 Fig. Histograms of GFP expression in cells from Fig 2.** Representative histograms are shown  
894 from experiments from experiments in Fig 2A, 2B, and 2C. **(A)** *EXT1*<sup>KO</sup> cells. **(B)** *SLC35B2*<sup>KO</sup> cells.  
895 **(C)** Sodium chlorate treated cells. Representative histograms are shown from a single  
896 experiment.

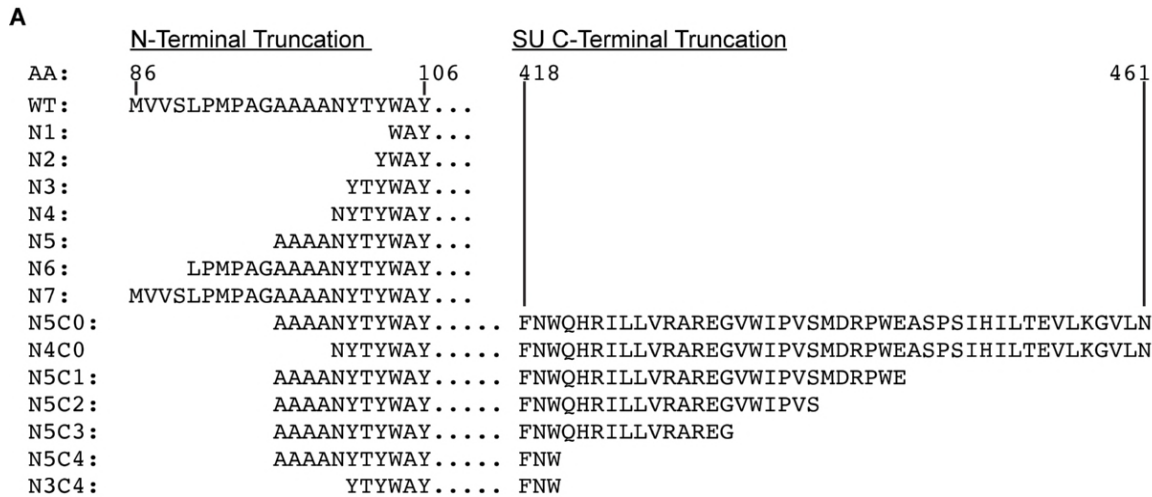

**B**

| Construct | Expressed | Processed | Fusogenic | pH of fusion | Aggregate/<br>insoluble |
|-----------|-----------|-----------|-----------|--------------|-------------------------|
| WT        | +++       | +++       | +++       | 5.4          |                         |
| N1        | +++       | -         | -         |              |                         |
| N2        | +++       | -         | -         |              |                         |
| N3        | +++       | +         | +++       | 5.4          |                         |
| N4        | +++       | +++       | +++       | 5.4          |                         |
| N5        | +++       | +++       | +++       | 5.4          |                         |
| N6        | +++       | +++       | ++++      | 6            |                         |
| N7        | +++       | +++       | ++++      | 6            |                         |
| N4C0      | +         |           |           |              | +++                     |
| N5C0      | +         |           |           |              | +++                     |
| N5C1      | -         |           |           |              |                         |
| N5C2      | N.D       |           |           |              |                         |
| N5C3      | +++       |           |           |              | -                       |
| N5C4      | ++        |           |           |              | +                       |
| N3C4      | -         |           |           |              |                         |

897

898 **S5 Fig. Generation and characterization of soluble HERV-K SU. (A)** Schematic of the sequences  
 899 of the various N- and C-terminal truncations tested. The tissue plasminogen activator signal  
 900 peptide was introduced at the N-terminus of all of the truncations. N1-N7 were made in  
 901 otherwise full-length sequences. C-terminal truncations were further modified with an HA-tag,  
 902 a 3C protease cleavage site, and a tandem His<sub>8x</sub>-His<sub>6x</sub> tag. Amino acid residue numbers are  
 903 indicated above the sequences, with 1 being the initiating methionine. **(B)** Characteristics of



904   HERV-K Env truncations. N1-N7 were expressed in BSRT7 cells and tested by Western blot for  
905   expression and proteolytic processing, and by cell-cell fusion assay for fusogenicity and pH  
906   dependence. C-terminal truncations were expressed in 293T cells. Protein in supernatant was  
907   isolated over cobalt resin and tested for expression, solubility and oligomerization state. N.D.:  
908   Not determined. Empty boxes: Assay not applicable to given construct. +: 1-30% of WT levels.  
909   +: 31-60% of WT levels. +++ 61-100% of WT levels. ++++: 101-130% of WT levels. For C-  
910   terminal truncations, values are compared to N5C3. pH of fusion: Highest pH at which cell-cell  
911   fusion was observed.

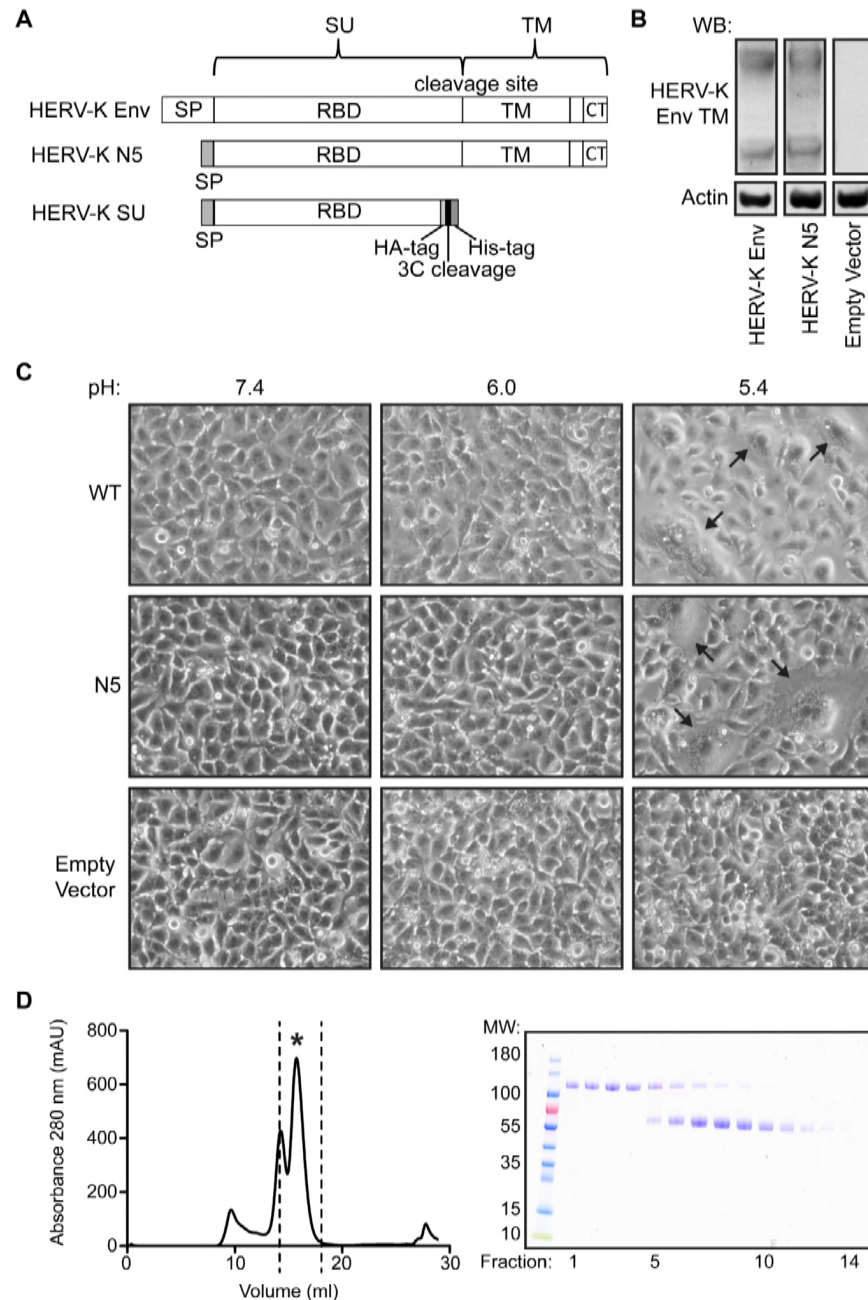

912

913 **S6 Fig. Validation of HERV-K SU.** (A) Schematic of HERV-K Env, HERV-K N-terminal truncation

914 N5, and HERV-K SU used in this study. (B) HERV-K Env and HERV-K N5 were transfected into

915 BSRT7 cells and cell lysates were subjected to Western blot against HERV-K Env TM subunit and

916 actin, to assess expression and proteolytic processing. For HERV-K Env blot: top band,

917 uncleaved Env; bottom band, TM subunit. (C) BSRT7 cells were transfected with HERV-K Env,

918   HERV-K N5, and empty vector. Cells were exposed to the indicated pH and assessed for the  
919   presence of multinucleated syncytia (indicated by arrows) **(D)** FPLC trace of HERV-K SU from gel  
920   filtration chromatography. The major peak (at approximately 15 ml, indicated with an asterisk)  
921   corresponds to monomeric SU. The peak at 13 ml corresponds to dimeric SU, and the peak at 9  
922   ml is an aggregate of SU. Fractions from the FPLC (indicated with dashed lines) were run on a  
923   non-reducing SDS-PAGE and coomassie stained. Fraction 1 corresponds to 14.16 ml and fraction  
924   14 corresponds to 18.06 ml. The top band at approximately 120 kDa represents the dimeric  
925   species and the lower band at approximately 60kDa represents monomer. Only fractions  
926   containing only monomer were used for pull-down experiments.

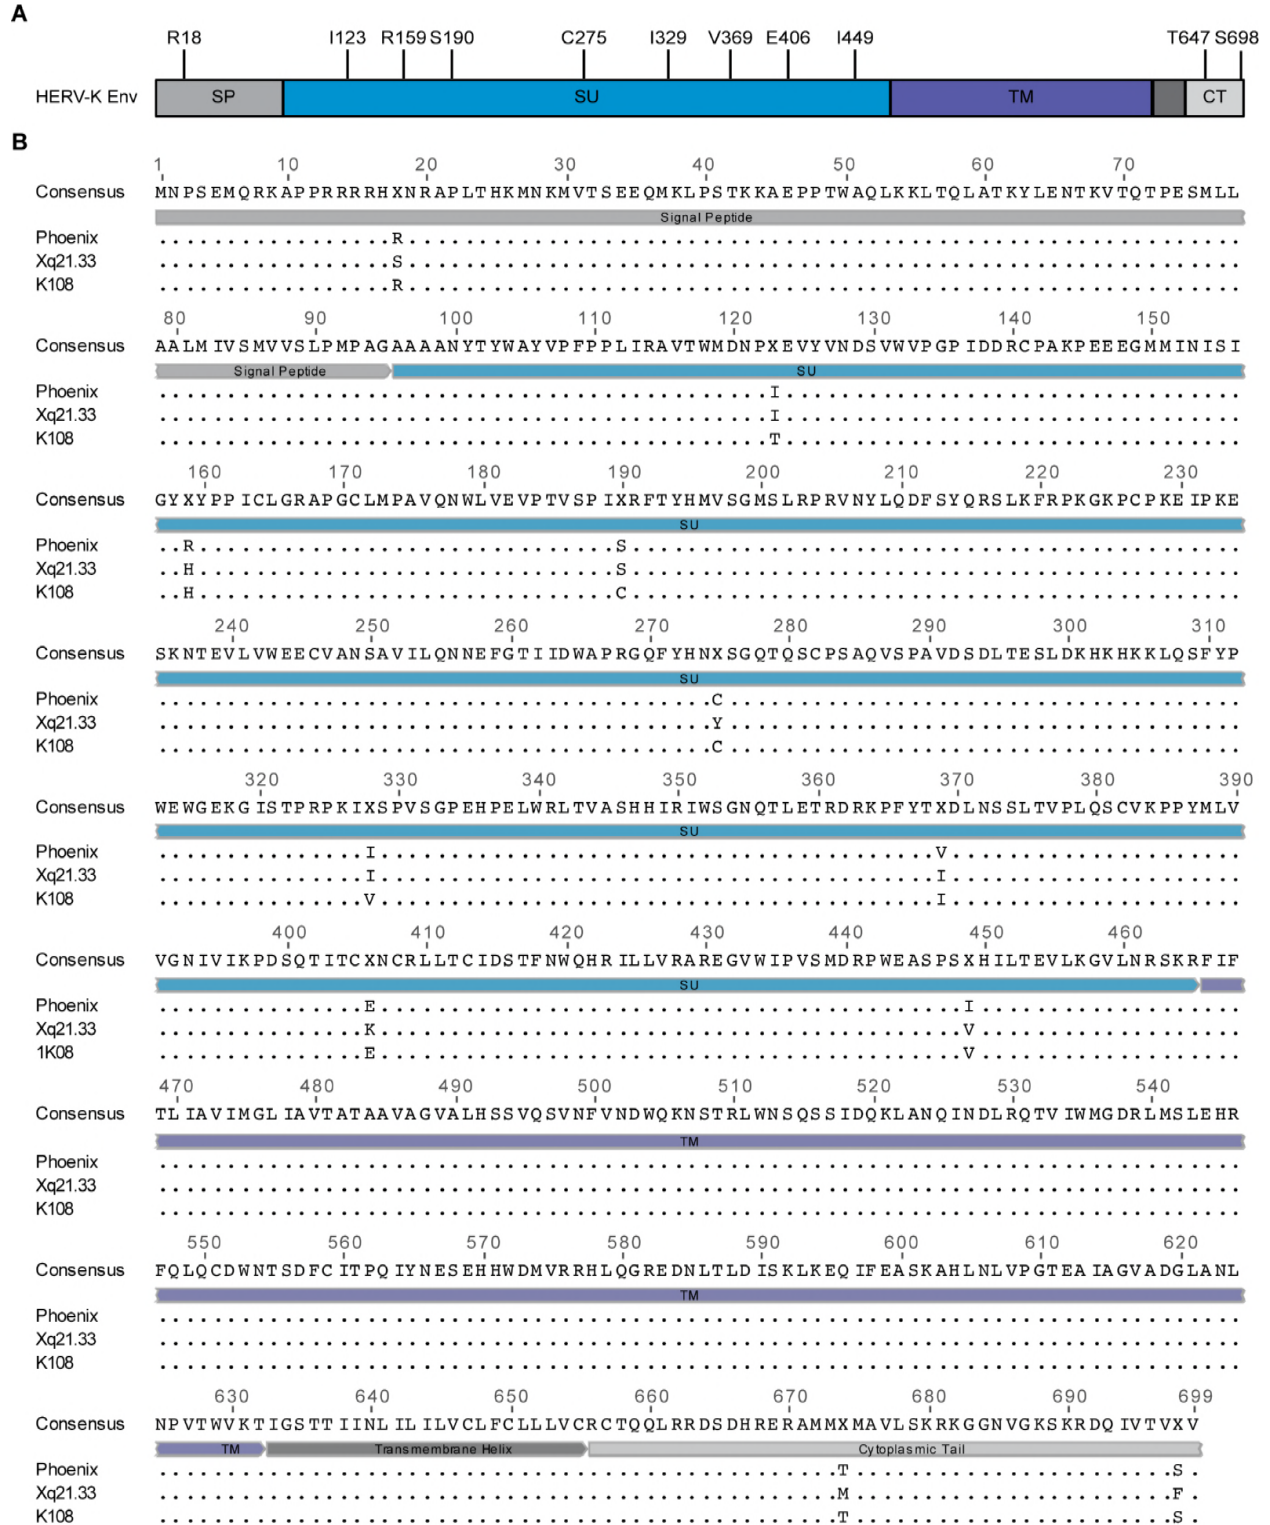

927

928 **S7 Fig. Alignment of Env sequences from Phoenix, Xq21.33, and HERV-K 108. (A)** Schematic of

929 HERV-K Env. Positions of amino acids with differences between Phoenix and either Xq21.33 or

930 K108 are shown with the amino acid identity in Phoenix indicated. SP: signal peptide. SU:  
931 surface subunit. TM: transmembrane subunit. CT: cytoplasmic tail. **(B)** Alignment of Phoenix,  
932 Xq21.33, and K108 Envs.  
933

934

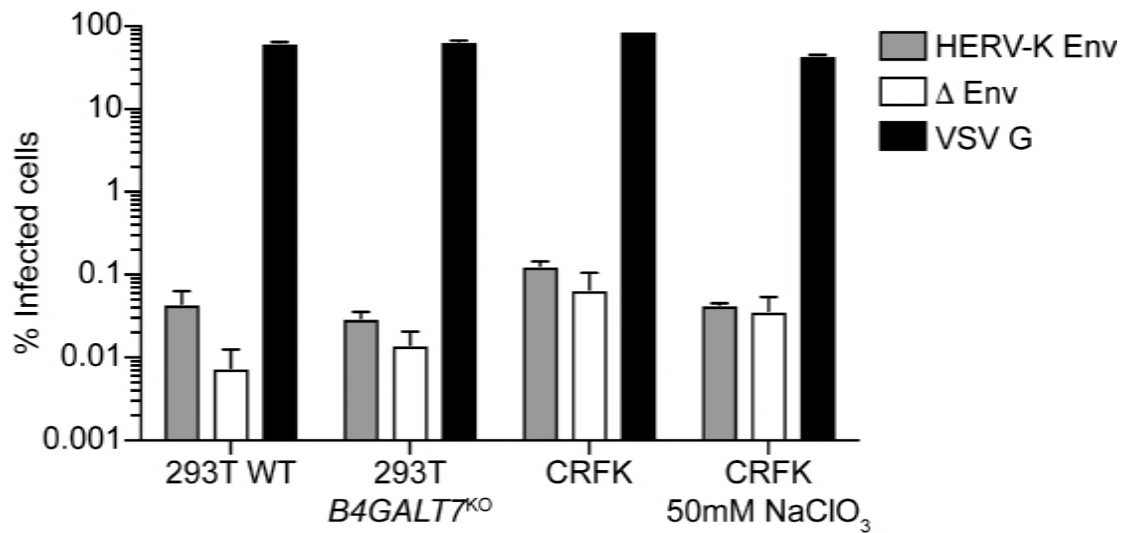

935

936 **S8 Fig. Relative infectivity of lentiviral pseudotypes.** Lentivirus was produced as described  
937 above and particle concentration determined by p24 ELISA. The indicated cell lines were  
938 inoculated with equal particle numbers, based on p24 levels. % infected cells was determined  
939 by flow cytometry to determine the % GFP positive cells. Pseudotypes bearing HERV-K Env have  
940 an approximately 4-log defect in relative infectivity compared to those bearing VSV G, and have  
941 relative infectivities close to that of “bald” ( $\Delta$  Env) particles.
